# Supplementary material for: Discovery of alkene-conjugated luciferins for redshifted and improved bioluminescence imaging in vitro and in vivo
Source: Royal Society of Chemistry journal article supplement (doi:10.1039/d1ob02477a), 2022-01-01

Supporting information for  
**Discovery of Alkene-Conjugated Luciferins for Redshifted and Improved  
Bioluminescence Imaging *in vitro* and *in vivo***

**Pei Zhao <sup>a†</sup>, Xiaokang Wu <sup>a</sup>, Jie Li <sup>a</sup>, Gaopan Dong <sup>a</sup>, Yingai Sun <sup>a</sup>, Zhao Ma <sup>a</sup>,  
Minyong Li <sup>a</sup>, and Lupei Du <sup>a\*</sup>**

<sup>a</sup> Department of Medicinal Chemistry, Key Laboratory of Chemical Biology (MOE), School of Pharmaceutical Sciences, Cheeloo College of Medicine, Shandong University, Jinan, Shandong 250012, China.

\* Corresponding Author: Tel/Fax: +86-531-8838-2076. Email: mli@sdu.edu.cn

† Authors contributed equally to this work.

## CONTENT

|                                                                                             |      |
|---------------------------------------------------------------------------------------------|------|
| Cytotoxicity test .....                                                                     | S-2  |
| Synthetic procedures .....                                                                  | S-2  |
| Bioluminescent spectra of novel substrates and D-luciferin under different pH conditions .. | S-8  |
| Tabularized values for graphs (Figures 4-6) .....                                           | S-9  |
| NMR, ESI-HRMS and HPLC spectra.....                                                         | S-12 |

## Cytotoxicity test

Cytotoxicity to ES-2-Fluc cells was determined using the CCK-8 method. ES-2-Fluc cells (8000 cells per well) were planted in a clear 96-well plate and grown for 24 hours at 37 °C. The wells were then filled with a variety of concentrations of the compounds (or DMSO control) dissolved in RPMI-1640. CCK-8 was added after an 8-hour incubation period at 37°C. A POLAR Star Omega microplate reader was used to determine cell viability.

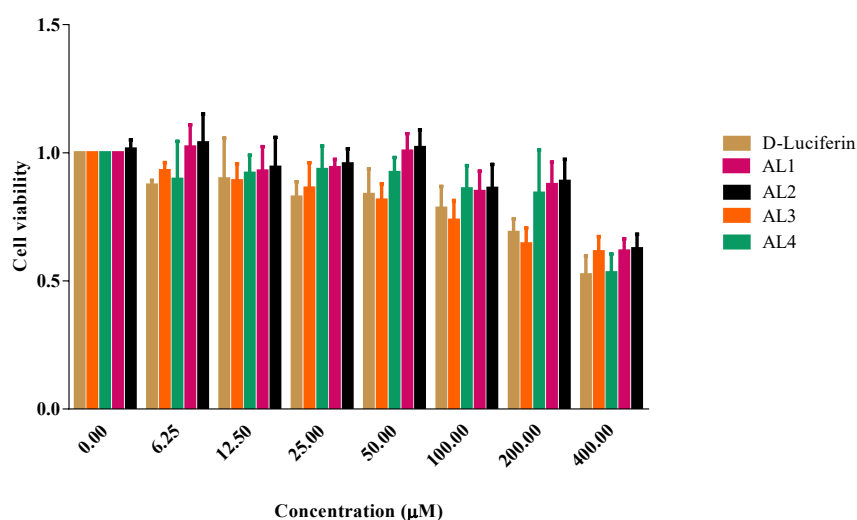

**Figure S1.** Cytotoxicity of novel D-Luciferin derivatives (CCK8 method)

## Synthetic procedures

### 2-Cyano-6-hydroxy benzothiazole (A)

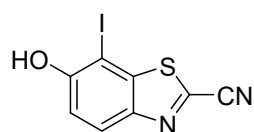

Hydroxybenzothiazole (16 mg, 91.3 μmol) was dissolved in toluene (7 mL) and the mixture was cooled to 0 °C. After stirred for 10 min, N-iodo succinimide (24.5 mg, 109 μmol) was added to the solution. The mixture was stirred for 10 h at room temperature. Upon completion, there was a large amount of insoluble matter, the mixture was filtered first, then collected solid. The filtrate was quenched with saturated Na<sub>2</sub>S<sub>2</sub>O<sub>3</sub> (2 x 20 mL), extracted with ethyl acetate (2 x 10 mL), washed the organic phase with saturated NaCl (2 x 20 mL), dried with anhydrous Na<sub>2</sub>SO<sub>4</sub>, filtered and concentrated under reduced pressure. The crude was purified by thin-layer chromatography (PE / EA = 2 / 1) affording product A as white solid (10mg, 36.45%). <sup>1</sup>H NMR (400 MHz, DMSO-*d*<sub>6</sub>) δ 11.43 (s, 1H), 8.10 (d, *J* = 8.9 Hz, 1H), 7.27 (d, *J* = 8.9 Hz, 1H).ESI-MS: found *m/z* 301.1 [M-H]<sup>-</sup>

### (E)-7-(2-cyanovinyl)-6-hydroxy-2-cyanobenzothiazole (B1)

Compound A (117 mg, 387 μmol) was dissolved in anhydrous acetonitrile (4 mL) of a

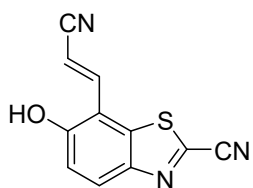

microwave reaction tube (10 mL). Acrylonitrile (61.7 mg, 1.16 mmol), palladium acetate (13.5 mg, 38.7  $\mu\text{mol}$ ) were added to the solution. The reaction temperature is 100  $^{\circ}\text{C}$ , and the microwave reaction time is 25 min. Upon completion, the mixture was diluted with ethyl acetate (10 mL), extracted with saturated  $\text{NH}_4\text{Cl}$  (2 x 20 mL), washed with saturated  $\text{NaCl}$  (2 x 20 mL), dried with anhydrous  $\text{Na}_2\text{SO}_4$ , then filtered and concentrated under reduced pressure. The mixture was purified by thin-layer chromatography (PE/EA=2/1) affording product B1 as light yellow solid (20 mg, 16%).  $^1\text{H}$  NMR (400 MHz,  $\text{DMSO}-d_6$ )  $\delta$  8.15 (d,  $J$  = 9.0 Hz, 1H), 7.79 (d,  $J$  = 16.8 Hz, 1H), 7.32 (d,  $J$  = 9.1 Hz, 1H), 6.49 (d,  $J$  = 16.7 Hz, 1H). ESI-MS: found  $m/z$  226  $[\text{M}-\text{H}]^-$ , 452.57  $[2\text{M}-\text{H}]^-$

#### Methyl(E)-3-(2-cyano-6-hydroxybenzothiazol-7-yl)acrylate (B2)

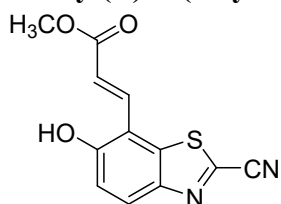

To a schlenk bottle of Compound A (200 mg, 662  $\mu\text{mol}$ ) in anhydrous acetonitrile (10 mL), were added tri-*o*-methyl phenyl phosphine (60.4 mg, 198  $\mu\text{mol}$ ), palladium acetate (34.67 mg, 99.31  $\mu\text{mol}$ ),  $\text{Et}_3\text{N}$  (276  $\mu\text{L}$ , 1.99  $\mu\text{mol}$ ) under nitrogen pressure. The reaction mixture was heated to 70  $^{\circ}\text{C}$  for 8 h. Upon completion, the reaction solution was diluted with ethyl acetate (10 mL), washed with saturated  $\text{NH}_4\text{Cl}$  (2 x 20 mL), washed with saturated  $\text{NaCl}$  (2 x 20 mL), collected the upper organic phase, dried with anhydrous  $\text{Na}_2\text{SO}_4$ , filtered and concentrated under reduced pressure, separated and purified by thin-layer chromatography (PE/EA=1/1). The product was obtained 40 mg, with a yield of 23%.  $^1\text{H}$  NMR (600 MHz,  $\text{DMSO}-d_6$ )  $\delta$  8.20 (d,  $J$  = 9.0 Hz, 1H), 8.04 (d,  $J$  = 16.4 Hz, 1H), 7.37 (d,  $J$  = 9.0 Hz, 1H), 6.55 (d,  $J$  = 16.4 Hz, 1H), 3.78 (s, 3H). ESI-MS found  $m/z$  259.53  $[\text{M}-\text{H}]^-$

#### (S,E)-4,5-dihydro-2-(7-(2-cyano)-6-hydroxybenzothiazol-2-yl)thiazole-4-carboxylic acid (AL1)

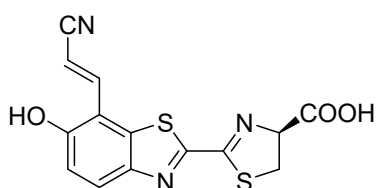

To a flask of compound B1 (26 mg, 114.42  $\mu\text{mol}$ ) in the solution of methanol (6 mL) and water (3 mL), were added  $\text{K}_2\text{CO}_3$  (16.76 mg, 121.28  $\mu\text{mol}$ ) and D-cysteine (20.7 mg, 117.85  $\mu\text{mol}$ ), and react for about 20 min. Upon completion, the reaction solution was concentrated under reduced pressure until the organic solvent is completely evaporated, adjusted pH to 2-4 with  $\text{HCl}$  (1 M). Water (4 mL) was added to the crude, there are solid crystals. The mixture was store in the refrigerator until all the solids are deposited. The mixture were filtered and washed with petroleum ether, collected solid and dried as product AL1 (20 mg, 52%); mp: 166-168  $^{\circ}\text{C}$ .  $^1\text{H}$  NMR (400 MHz, MeOD)  $\delta$  7.93 (d,  $J$  = 8.9 Hz, 1H), 7.82 (d,  $J$  = 16.9 Hz, 1H), 7.14 (d,  $J$  = 8.9 Hz, 1H), 6.39 (d,  $J$  = 16.9 Hz, 1H), 5.29 – 5.18 (m, 1H), 3.84 – 3.68 (m, 2H).  $^{13}\text{C}$  NMR (101 MHz, MeOD)  $\delta$  171.70, 165.84, 154.43, 148.88, 145.44, 144.02, 135.37, 127.38, 118.71, 118.03, 109.03, 95.90, 77.84, 34.94 ESI-MS found  $m/z$  330  $[\text{M}-\text{H}]^-$ ; ESI-HRMS calcd: 331, found: 330.0005  $[\text{M}-\text{H}]^-$

#### (S,E)-4,5-dihydro-2-(7-(3-methoxy-3-oxoprop-1-en-1-yl)6-aminobenzothiazol-2-yl)thiazole-4-Formic acid(AL2)

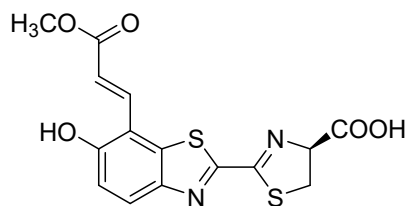

To a flask of compound B2 (40 mg, 153.7  $\mu\text{mol}$ ) in the mixture solution water (3 mL) and methanol (6 mL), was added  $\text{K}_2\text{CO}_3$  (27.8 mg, 158  $\mu\text{mol}$ ). The mixture was stirred for 10 min. D-cysteine (22.7mg, 163  $\mu\text{mol}$ ) were added to the solution, the mixture was stirred for 20 min. The mixture was

concentrated under reduced pressure until the methanol is completely evaporated in solution, then adjusted pH to 3, and placed it in the refrigerator to fully cool down. A large amount of solids precipitated out, then filtered, and rinsed the product with a small amount of petroleum ether and dried to obtain compound AL2 (40 mg, 72%); mp: 164-166°C.  $^1\text{H}$  NMR (400 MHz, MeOD)  $\delta$  8.05 (d,  $J$  = 16.4 Hz, 1H), 7.83 (d,  $J$  = 8.9 Hz, 1H), 7.03 (d,  $J$  = 8.9 Hz, 1H), 6.54 (d,  $J$  = 16.4 Hz, 1H), 5.31 (t,  $J$  = 9.1 Hz, 1H), 3.73 (s, 3H), 3.69 (d,  $J$  = 3.2 Hz, 1H), 3.66 (d,  $J$  = 2.4 Hz, 1H).  $^{13}\text{C}$  NMR (101 MHz, MeOD)  $\delta$  171.94, 168.05, 165.97, 157.67, 156.99, 147.35, 137.72, 136.11, 126.87, 119.56, 116.73, 114.05, 78.40, 50.81, 34.55. ESI-MS found  $m/z$  363.5  $[\text{M}-\text{H}]^-$ ; ESI-HRMS calcd.: 364.39, found: 365.0259  $[\text{M}+\text{H}]^+$

### 2-bromo-4-nitrophenyl methanesulfonate (A')

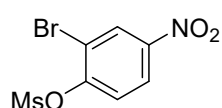

To a solution of 2-bromo-4-nitrophenol (100 mg, 458  $\mu\text{mol}$ ) and anhydrous  $\text{Et}_3\text{N}$  (6.7 mL, 48.4 mmol) in dry DCM (20 mL) under nitrogen, was added dropwise methanesulfonyl chloride (2.20 mL, 28.4 mmol). Then reaction mixture was stirred at 0 °C for 2 h. Upon completion, the reaction was quenched (1 M  $\text{NaHSO}_4$ ) and washed with 1 M  $\text{NaHSO}_4$  (3 x 30 mL), saturated  $\text{NH}_4\text{Cl}$  (1 x 30 mL), and brine (3 x 30 mL). The organic phase was dried over anhydrous  $\text{Na}_2\text{SO}_4$ , filtered, and concentrated under reduced pressure. Purification by silica gel column chromatography (PE/EA=3/1) yield compound A' as light grey solid (101 mg, 75%); mp: 79-81°C.  $^1\text{H}$  NMR (400 MHz,  $\text{DMSO}-d_6$ )  $\delta$  8.61 (s, 1H), 8.34 (d,  $J$  = 9.0 Hz, 1H), 7.80 (d,  $J$  = 9.0 Hz, 1H), 3.64 (s, 3H). ESI-MS found  $m/z$  298.99  $[\text{M}+\text{H}]^+$

### 3-amino-2-bromophenyl methanesulfonate (B')

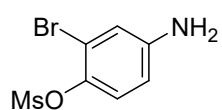

A solution of Compound A' (300 mg, 1.01 mmol) in acetone (5 mL), a mixture of iron powder (362.13 mg, 6.48mmol) in acetic acid (3 mL), and water(10mL) were added to 40 mL schlenk bottle. The reaction mixture was heated to 70°C, stirred for 1.5 h, filtered hot through a pad of Celite. The filtrate was neutralized with saturated  $\text{K}_2\text{CO}_3$  solution and washed with saturated EDTA solution (2 x 50 ml) to remove any additional iron species, extracted with ethyl acetate (50 mL), and dry with anhydrous  $\text{Na}_2\text{SO}_4$ , filtered and concentrated *in vacuo*. The residue was purified by Column chromatography on silica gel (PE/EA=2/5) affording compound B' as white solid (224 mg, 84%).  $^1\text{H}$  NMR (400 MHz,  $\text{CDCl}_3$ )  $\delta$  7.21 (d,  $J$  = 8.8 Hz, 2H), 6.90 (d,  $J$  = 2.8 Hz, 2H), 6.60 (dd,  $J$  = 8.8, 2.8 Hz, 2H), 3.80 (s, 3H), 3.20 (s, 5H). ESI-MS found  $m/z$  287.93  $[\text{M}+\text{Na}]^+$

### Methyl(E)-3-(5-amino-2-((methylsulfonyl)oxy)phenyl)acrylate (C'3)

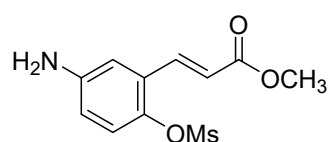

Compound B' (224 mg, 841  $\mu\text{mol}$ ), tri-*o*-methylphenylphosphine (76.9 mg, 252  $\mu\text{mol}$ ),  $\text{Et}_3\text{N}$  (351 mL, 2.53 mmol), methyl acrylate (217.4 mg, 2.53 mmol)

in ultra-dry acetonitrile (8 mL) were added to a 20 mL schlenk bottle vacuumed to replace nitrogen for three times. Then palladium acetate (44.1 mg, 126  $\mu\text{mol}$ ) was added under nitrogen pressure. The reaction was heated in a 70 °C oil bath for 8 h, and the reaction was monitored by TLC. Upon completion, the reaction mixture was extracted with saturated  $\text{NH}_4\text{Cl}$  (2 x 20 ml), ethyl acetate (2 x 20 ml), dried with anhydrous  $\text{Na}_2\text{SO}_4$ , filtered and concentrated *in vacuo*. The residue was purified by Column chromatography on silica gel (PE/EA=3/1) affording compound C'3 as light yellow solid (133 mg, 58.1%); m.p: 102-104°C.  $^1\text{H}$  NMR (400 MHz,  $\text{DMSO}-d_6$ )  $\delta$  7.71 (d,  $J = 16.1$  Hz, 1H), 7.13 (d,  $J = 8.8$  Hz, 1H), 6.98 (d,  $J = 2.7$  Hz, 1H), 6.70 (dd,  $J = 8.8, 2.7$  Hz, 1H), 6.43 (d,  $J = 16.0$  Hz, 1H), 5.39 (s, 2H), 3.74 (s, 3H). ESI-MS found  $m/z$  294.65  $[\text{M}+\text{Na}]^+$

**(E) -4-amino-2-(2-cyano)phenylmethanesulfonate (C'4)**

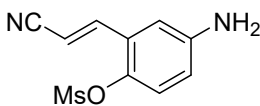 100 mg compound B', 43 mg N-methyldicyclohexylamine, 59.7 $\mu\text{L}$  acrylonitrile, 12.9 mg tris(dibenzylideneacetone) dipalladium, and tri-tert-butyl tetrafluoroborate were added into a 100 mL double-necked flask. Then 10.6 mg phosphine, 10mL ultra-dry 1,4-dioxane as solvent were added, vacuumed nitrogen replacement three times. The reaction was heated in a 120 °C oil bath for 72 h, and the reaction was monitored by TLC. Upon completion, the reaction mixture was concentrated under reduced pressure. The residue was purified by Column chromatography on silica gel (PE/EA=4/1 ) affording compound C'4 as light grey solid (20 mg, 53%); mp: 102-104°C.  $^1\text{H}$  NMR (400 MHz,  $\text{DMSO}-d_6$ )  $\delta$  8.77 (d,  $J = 2.7$  Hz, 1H), 8.41 (dd,  $J = 9.0, 2.8$  Hz, 1H), 7.79 (dd,  $J = 19.0, 12.9$  Hz, 2H), 6.90 (d,  $J = 16.7$  Hz, 1H), 3.70 (s, 3H). ESI-MS found  $m/z$  239.09  $[\text{M}+\text{H}]^+$

**Methyl(E)-3-(5-((cyanocarbonyl)amino)-2-((methylsulfonyl)oxy)phenyl)acrylate (D'3)**

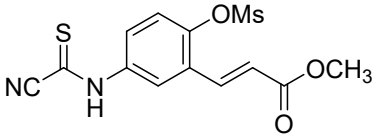 To a flask of Compound C'3 (1.01 g, 3.72 mmol), was added Appel's salt (4, 5-dichloro-1, 2, 3-dithiazol-1-ium chloride, 931.49 mg, 4.47 mmol), followed by an nitrogen flush. Anhydrous THF (20 mL) and anhydrous ACN (20 mL) was immediately added and the reaction was stirred at room temperature for 5 min under nitrogen pressure. Upon consumption of starting material, anhydrous pyridine (618.44mg, 7.82 mmol) was slowly added. The reaction mixture was allowed to stir overnight, and the solution of  $\text{Na}_2\text{S}_2\text{O}_3$  (1.51g, 7.82mmol) was added under nitrogen pressure. The mixture was stirred for 3h, and monitored by TLC. The mixture was extracted with ethyl acetate (2 x 50 ml), washed with 1 M  $\text{NaHSO}_4$  (3 x 50 mL), dried with anhydrous  $\text{Na}_2\text{SO}_4$ , and purified by column chromatography on silica gel affording compound D'3 as white solid (1.06g, 80%); m.p: 185-187°C.  $^1\text{H}$  NMR (400 MHz,  $\text{DMSO}-d_6$ )  $\delta$  13.64 (s, 1H), 8.43 (d,  $J = 2.4$  Hz, 1H), 7.91 (dd,  $J = 8.8, 2.5$  Hz, 1H), 7.79 (d,  $J = 16.1$  Hz, 1H), 7.63 (d,  $J = 8.8$  Hz, 1H), 6.61 (d,  $J = 16.1$  Hz, 1H), 3.76 (s, 3H), 3.57 (s, 3H). ESI-MS found  $m/z$  339.05  $[\text{M}-\text{H}]^-$

**(E) -4-((cyanocarbonyl)amino)-2-(2-cyanovinyl)phenylmethanesulfonate (D'4)**

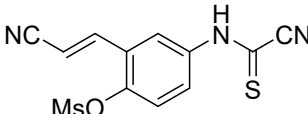 To a flask of C'4 (500 mg, 2.1 mmol), was added Appel's salt (4, 5-dichloro-1, 2, 3-dithiazol-1-ium chloride, 525 mg,

2.52 mmol), followed by a nitrogen flush. Anhydrous THF (10 mL) and anhydrous ACN (10 mL) was immediately added and the reaction was stirred at room temperature for 5 min under nitrogen pressure. Upon consumption of starting material, anhydrous pyridine (348.60mg, 4.41mmol) was slowly added. The reaction mixture was allowed to stir overnight, and the solution of Na<sub>2</sub>S<sub>2</sub>O<sub>3</sub> (995 mg, 6.30mmol) was added under nitrogen pressure. The mixture was stirred for 3h, and monitored by TLC. The mixture was extracted with ethyl acetate (2 x 50 ml), washed with 1 M NaHSO<sub>4</sub> (3 x 50 mL), dried with anhydrous Na<sub>2</sub>SO<sub>4</sub>, and purified by column chromatography on silica gel affording compound D'4 as white solid (103 mg, 30%); m.p:147-149 °C; <sup>1</sup>H NMR (400 MHz, DMSO-*d*<sub>6</sub>) δ 8.30 (d, *J* = 2.3 Hz, 1H), 7.92 (dd, *J* = 8.8, 2.5 Hz, 1H), 7.76 (d, *J* = 16.7 Hz, 1H), 7.60 (d, *J* = 8.8 Hz, 1H), 6.48 (d, *J* = 16.7 Hz, 1H), 3.61 (d, *J* = 4.7 Hz, 3H).ESI-MS found m/z 306.10 [M-H]<sup>-</sup>

**Methyl(E)-3-(2-cyano-6-((methylsulfonyl)oxy)benzothiazol-5-yl)acrylate methyl (E'3)**

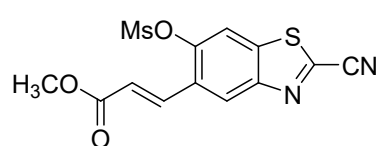

Compound D'3 (76 mg, 223 μmol), palladium chloride (8.09 mg, 26.8 μmol), copper (I) iodide (23.4 mg, 122 μmol), and TBAB (1512 mg, 46.9 μmol) were added in a 25 mL double-necked flask evacuated and replaced with nitrogen three times, and the mixed solution of DMSO (10 mL) and DMF (10 mL) as the reaction solvent was added. Then the mixture was heated in a 120 °C oil bath for 4 h and the reaction was monitored by TLC. Upon completion, the mixture was diluted with ethyl acetate, extracted with saturated NH<sub>4</sub>Cl, washed with water, dried with anhydrous Na<sub>2</sub>SO<sub>4</sub>, filtered and concentrated under reduced pressure, then purified by preparative thin layer chromatography (PE/EA=1/1) affording compound E'3 as light grey solid (25 mg, 36%); mp: 157-159°C. <sup>1</sup>H NMR (400 MHz, DMSO-*d*<sub>6</sub>) δ 8.93 (s, 1H), 8.54 (s, 1H), 7.88 (d, *J* = 16.1 Hz, 1H), 7.01 (d, *J* = 16.1 Hz, 1H), 3.78 (s, 3H), 3.62 (s, 3H). ESI-MS found m/z 361.87 [M+Na]<sup>+</sup>

**(F) -2-cyano-5-(2-cyanovinyl)benzothiazole-6-ylmethanesulfonate (E'4)**

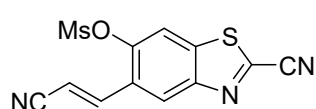

The reaction steps are the same as compound E'3, and the final product is 42.5 mg, and the yield is 40%; m.p: 249-251°C. <sup>1</sup>H NMR (400 MHz, DMSO-*d*<sub>6</sub>) δ 8.87 (s, 1H), 8.54 (s, 1H), 7.87 (d, *J* = 16.7 Hz, 1H), 6.84 (d, *J* = 16.6 Hz, 1H), 3.68 (s, 2H), 3.32 (s, 2H), 2.50 (s, 3H). ESI-MS found m/z 326.6 [M+Na]<sup>+</sup>

**Methyl(E)-3-(2-cyano-6-hydroxybenzothiazol-5-yl)acrylate (F'3)**

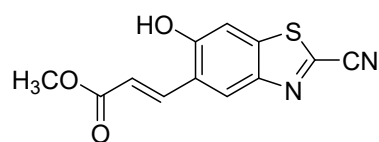

To a flask of compound E'3 (30 mg, 88.7 μmol), was added ultra-dry tetrahydrofuran (10 mL). 75% tetrabutylammonium fluoride solution was added dropwise into the reaction solution, followed by nitrogen flush. The reaction was stirred for 1h and monitored by TLC. Upon completion, the reaction solution was concentrated under reduced pressure, dissolved by ethyl acetate, washed with saturated NaCl, dried with anhydrous Na<sub>2</sub>SO<sub>4</sub>. The mixture was filtered, concentrated in vacuo and purified by thin-layer chromatography (PE/EA=2/3) affording product F'3 (13 mg, 56.3%). <sup>1</sup>H NMR (400 MHz, DMSO-*d*<sub>6</sub>) δ 8.57 (s, 1H), 7.96 (d, *J* = 16.2 Hz, 1H), 7.68 (s, 1H), 6.89 (d, *J* =

16.2 Hz, 1H), 3.74 (s, 3H). ESI-MS found  $m/z$  259.53  $[M-H]^-$

**(E) - 5 - (2-cyano vinyl) - 6-hydroxybenzothiazole-2-carbonitrile (F'4)**

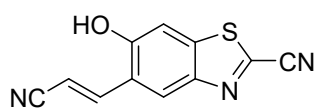

The experimental procedure was the same as that of F'3. The final product was 52 mg with a yield of 28%; m.p:339-341 °C.  $^1H$  NMR (400 MHz, DMSO- $d_6$ )  $\delta$  11.51 (s, 1H), 8.49 (s, 1H), 7.79 (d,  $J = 16.8$  Hz, 1H), 7.71 (s, 1H), 6.70 (d,  $J = 16.8$  Hz, 1H). ESI-MS found  $m/z$  226.16  $[M-H]^-$

**(S,E)-4,5-dihydro-2-(5-(3-oxobut-1-en-1-yl)6-hydroxybenzothiazol-2-yl)thiazole-4-carboxylic acid (AL3)**

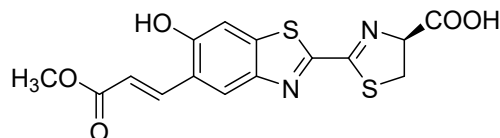

Compound F'3 (41 mg, 157  $\mu$ mol) was dissolved in the mixture solution methanol (8 mL) and water (4 mL). Then D-cysteine (20.2 mg, 167  $\mu$ mol) and anhydrous  $K_2CO_3$  (22.4 mg, 162  $\mu$ mol) were added. After stirred at room temperature for 20 min, TLC was used to monitor the reaction. The crude was concentrated to remove methanol, adjusted pH to 2-3 with HCl (1M). A large amount of solid precipitated, filtrated, purified with HPLC to provide compound AL3 as a brown solid (30 mg, 53%); mp: 133-135°C.  $^1H$  NMR (400 MHz, DMSO- $d_6$ )  $\delta$  7.42 (s, 1H), 7.25 (d,  $J = 16.1$  Hz, 1H), 6.60 (s, 1H), 5.95 (d,  $J = 16.1$  Hz, 1H), 4.59 (s, 2H), 3.04 (s, 1H), 3.01 (s, 3H), 2.98 (d,  $J = 8.4$  Hz, 1H).  $^{13}C$  NMR (101 MHz, MeOD)  $\delta$  172.16, 167.92, 158.42, 156.45, 147.13, 140.11, 139.28, 129.72, 123.58, 122.99, 118.26, 106.46, 78.35, 51.11, 34.56. ESI-MS found  $m/z$  365.19  $[M+H]^+$ , ESI-HRMS calcd for:364.39, found: 363.0162  $[M-H]^-$

**(S,E)-4,5-dihydro-2-(5-(2-cyanovinyl)-6-hydroxybenzothiazol-2-yl)thiazole-4-carboxylic acid (AL4)**

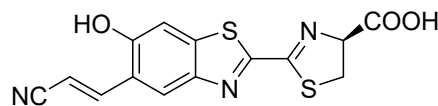

To a flask of compound F'4 (46 mg, 202  $\mu$ mol) in the solution of methanol (8 mL) and water (4 mL), were added D-cysteine (36.6 mg, 208  $\mu$ mol) and anhydrous  $K_2CO_3$  (29.7 mg, 215  $\mu$ mol). After stirred at room temperature for 20 min, the reaction was basically completed. Methanol is removed by vacuum rotary evaporation, and water (5 mL) is added, and then the pH is adjusted to 2-3 with HCl (1M). A large amount of solid precipitated, filtrated, and washed the upper solid with petroleum ether (10 mL), and dried to provide product AL4 as solid (20mg , 33%); mp: 229-231°C.  $^1H$  NMR (400 MHz, MeOD)  $\delta$  8.18 (s, 1H), 7.78 (d,  $J = 16.8$  Hz, 1H), 7.42 (s, 0H), 6.52 (d,  $J = 5.8$  Hz, 0H), 5.41 (t,  $J = 9.1$  Hz, 1H), 3.83 – 3.73 (m, 1H).  $^{13}C$  NMR (101 MHz,  $CDCl_3$ )  $\delta$  176.04, 169.73, 162.86, 160.26, 150.86, 150.38, 144.07, 127.35, 126.23, 122.42, 110.92, 100.75, 82.17, 38.45. ESI-HRMS calcd.: 331.36, found: 329.9995  $[M-H]^-$

## Bioluminescent spectra of novel substrates and D-luciferin under different pH

conditions

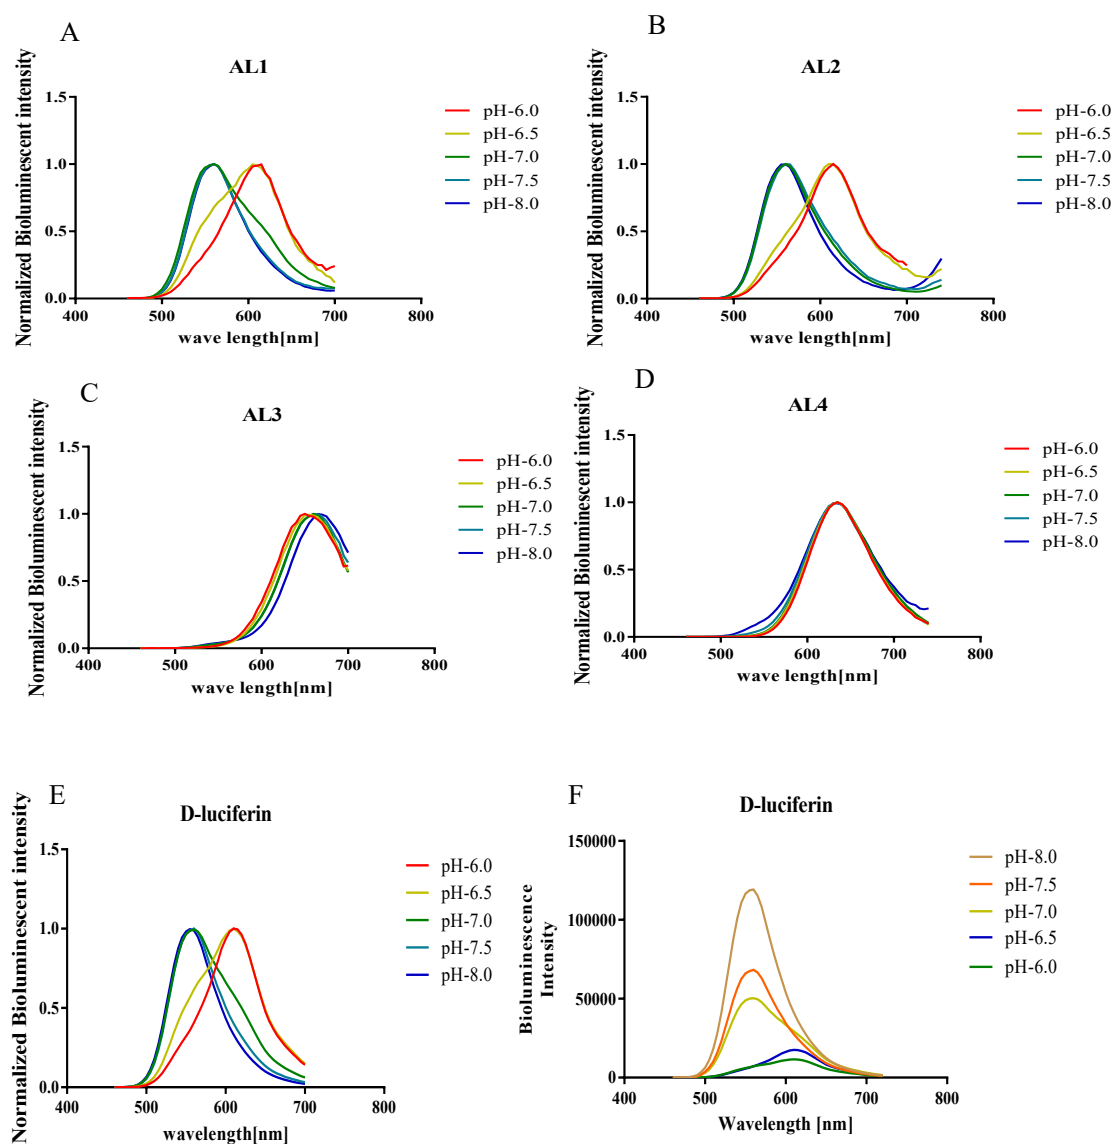

**Figure S2:** Normalized bioluminescent spectra of target products in various buffer solutions. The Normalized bioluminescent spectra of compound AL1(A), AL2(B), AL3(C), AL4(D), D-luciferin(E) in various pH buffer solutions. The bioluminescent spectra of D-luciferin(F).



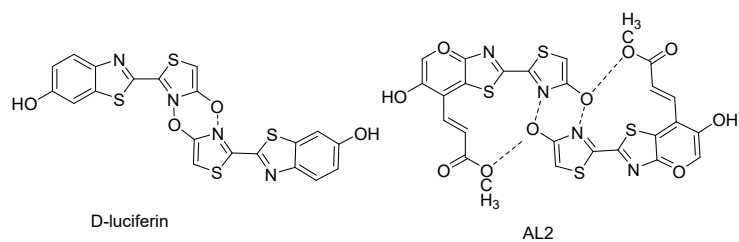

**Figure S3:** Possible excited state intermediates of D-luciferin and AL2. Dotted lines indicate hydrogen bonds

**Tabularized values for graphs (Figures 4–6)**

**Table S1:** Tabularized values for **Figure 4A**

| Concentration<br>( $\mu\text{M}$ ) | D-luciferin |          |          | AL-1     |          |          | AL-2     |          |          |
|------------------------------------|-------------|----------|----------|----------|----------|----------|----------|----------|----------|
| 0.00                               | 1.86E+07    | 1.52E+07 | 1.85E+07 | 1.10E+07 | 2.01E+06 | 2.66E+06 | 4.47E+07 | 6.11E+07 | 1.96E+07 |
| 2.50                               | 3.08E+08    | 2.78E+08 | 2.74E+08 | 1.77E+07 | 9.23E+06 | 1.10E+07 | 3.97E+08 | 4.03E+08 | 4.21E+08 |
| 5.00                               | 6.01E+08    | 5.32E+08 | 5.34E+08 | 1.78E+07 | 9.14E+06 | 1.09E+07 | 6.60E+08 | 6.44E+08 | 6.79E+08 |
| 10.00                              | 9.77E+08    | 1.10E+09 | 1.04E+09 | 2.48E+07 | 1.40E+07 | 1.41E+07 | 8.70E+08 | 8.49E+08 | 8.90E+08 |
| 20.00                              | 1.22E+09    | 2.02E+09 | 1.85E+09 | 3.17E+07 | 1.73E+07 | 2.15E+07 | 9.70E+08 | 1.05E+09 | 1.21E+09 |
| 40.00                              | 3.19E+09    | 2.95E+09 | 2.91E+09 | 4.05E+07 | 4.09E+07 | 3.80E+07 | 1.91E+09 | 1.92E+09 | 1.98E+09 |
| 50.00                              | 3.20E+09    | 3.11E+09 | 3.20E+09 | 4.40E+07 | 4.18E+07 | 3.89E+07 | 1.69E+09 | 1.69E+09 | 1.96E+09 |
| 75.00                              | 3.79E+09    | 3.65E+09 | 3.70E+09 | 4.31E+07 | 4.33E+07 | 3.92E+07 | 2.13E+09 | 1.91E+09 | 2.12E+09 |
| 100.00                             | 4.92E+09    | 4.93E+09 | 4.79E+09 | 4.63E+07 | 4.57E+07 | 4.72E+07 | 1.98E+09 | 1.87E+09 | 2.20E+09 |
| Concentration<br>( $\mu\text{M}$ ) | AL-3        |          |          | AL-4     |          |          |          |          |          |
| 0.00                               | 1.18E+07    | 1.01E+07 | 1.03E+07 | 5.07E+06 | 3.47E+06 | 1.43E+06 |          |          |          |
| 2.50                               | 2.48E+08    | 2.71E+08 | 2.46E+08 | 1.93E+07 | 8.24E+06 | 7.83E+06 |          |          |          |
| 5.00                               | 3.25E+08    | 3.28E+08 | 3.25E+08 | 2.48E+07 | 9.14E+06 | 1.09E+07 |          |          |          |
| 10.00                              | 4.30E+08    | 4.31E+08 | 4.32E+08 | 1.78E+07 | 1.40E+07 | 1.41E+07 |          |          |          |
| 20.00                              | 5.72E+08    | 5.47E+08 | 5.27E+08 | 3.17E+07 | 1.73E+07 | 2.15E+07 |          |          |          |
| 40.00                              | 6.61E+08    | 6.27E+08 | 6.08E+08 | 3.62E+07 | 2.35E+07 | 2.79E+07 |          |          |          |
| 50.00                              | 6.94E+08    | 6.52E+08 | 6.53E+08 | 4.58E+07 | 2.50E+07 | 2.84E+07 |          |          |          |
| 75.00                              | 7.24E+08    | 6.84E+08 | 6.73E+08 | 5.17E+07 | 3.67E+07 | 3.45E+07 |          |          |          |
| 100.00                             | 7.02E+08    | 7.06E+08 | 7.24E+08 | 5.29E+07 | 3.69E+07 | 3.52E+07 |          |          |          |

**Table S2: Tabularized values for Figure 4B**

| Time<br>(min) | D-luciferin |          |          | AL-1     |          |          | AL-2     |          |          |
|---------------|-------------|----------|----------|----------|----------|----------|----------|----------|----------|
|               | 0           | 3.80E+09 | 3.65E+09 | 3.75E+09 | 4.05E+07 | 4.09E+07 | 3.80E+07 | 1.91E+09 | 1.92E+09 |
| 1             | 3.19E+09    | 2.95E+09 | 2.91E+09 | 3.58E+07 | 3.43E+07 | 3.13E+07 | 1.55E+09 | 1.54E+09 | 1.54E+09 |
| 2             | 2.84E+09    | 2.68E+09 | 2.59E+09 | 3.68E+07 | 2.94E+07 | 2.48E+07 | 1.10E+09 | 1.10E+09 | 1.08E+09 |
| 3             | 2.60E+09    | 2.46E+09 | 2.37E+09 | 2.89E+07 | 2.82E+07 | 3.10E+07 | 1.01E+09 | 1.01E+09 | 9.81E+08 |
| 4             | 2.40E+09    | 2.30E+09 | 2.20E+09 | 2.66E+07 | 2.63E+07 | 2.94E+07 | 9.30E+08 | 9.28E+08 | 8.96E+08 |
| 5             | 2.23E+09    | 2.15E+09 | 2.04E+09 | 2.86E+07 | 2.26E+07 | 2.14E+07 | 8.63E+08 | 8.55E+08 | 8.23E+08 |
| 6             | 1.94E+09    | 1.89E+09 | 1.76E+09 | 2.71E+07 | 2.67E+07 | 2.34E+07 | 8.03E+08 | 7.95E+08 | 7.62E+08 |
| 7             | 1.82E+09    | 1.78E+09 | 1.65E+09 | 2.54E+07 | 2.52E+07 | 2.28E+07 | 6.62E+08 | 6.54E+08 | 6.13E+08 |
| 9             | 1.71E+09    | 1.69E+09 | 1.55E+09 | 2.35E+07 | 2.48E+07 | 2.14E+07 | 5.97E+08 | 5.86E+08 | 5.42E+08 |
| 11            | 1.50E+09    | 1.49E+09 | 1.35E+09 | 2.27E+07 | 2.26E+07 | 1.98E+07 | 5.69E+08 | 5.55E+08 | 5.08E+08 |
| 13            | 1.40E+09    | 1.40E+09 | 1.27E+09 | 2.17E+07 | 2.03E+07 | 1.85E+07 | 5.38E+08 | 5.29E+08 | 4.79E+08 |
| 15            | 1.29E+09    | 1.29E+09 | 1.17E+09 | 2.10E+07 | 2.02E+07 | 1.76E+07 | 5.15E+08 | 5.07E+08 | 4.56E+08 |
| 17            | 1.20E+09    | 1.20E+09 | 1.08E+09 | 1.83E+07 | 1.70E+07 | 1.56E+07 | 4.95E+08 | 4.83E+08 | 4.35E+08 |
| 19            | 1.12E+09    | 1.12E+09 | 9.94E+08 | 1.75E+07 | 1.80E+07 | 1.56E+07 | 4.51E+08 | 4.41E+08 | 3.94E+08 |
| 21            | 1.05E+09    | 1.05E+09 | 9.22E+08 | 1.77E+07 | 1.72E+07 | 1.50E+07 | 4.31E+08 | 4.24E+08 | 3.75E+08 |
| 23            | 9.75E+08    | 9.80E+08 | 8.50E+08 | 1.62E+07 | 1.64E+07 | 1.42E+07 | 4.13E+08 | 4.05E+08 | 3.56E+08 |
| 25            | 9.13E+08    | 9.26E+08 | 7.92E+08 | 1.71E+07 | 1.56E+07 | 1.44E+07 | 3.93E+08 | 3.87E+08 | 3.42E+08 |
| 27            | 8.52E+08    | 8.68E+08 | 7.39E+08 | 1.57E+07 | 1.49E+07 | 1.25E+07 | 3.76E+08 | 3.71E+08 | 3.25E+08 |
| 29            | 7.98E+08    | 8.22E+08 | 6.94E+08 | 1.60E+07 | 1.44E+07 | 1.26E+07 | 3.60E+08 | 3.51E+08 | 3.10E+08 |
| Time<br>(min) | AL-3        |          |          | AL-4     |          |          |          |          |          |
| 0             | 7.37E+08    | 7.10E+08 | 7.25E+08 | 3.14E+07 | 2.36E+07 | 2.53E+07 |          |          |          |
| 1             | 6.20E+08    | 5.88E+08 | 5.73E+08 | 4.87E+07 | 2.59E+07 | 2.92E+07 |          |          |          |
| 2             | 5.41E+08    | 5.15E+08 | 5.58E+08 | 5.24E+07 | 3.04E+07 | 3.45E+07 |          |          |          |
| 3             | 4.80E+08    | 4.58E+08 | 4.89E+08 | 5.50E+07 | 3.78E+07 | 3.91E+07 |          |          |          |
| 4             | 4.53E+08    | 4.31E+08 | 4.57E+08 | 5.83E+07 | 4.06E+07 | 4.23E+07 |          |          |          |
| 5             | 4.03E+08    | 3.85E+08 | 4.03E+08 | 6.27E+07 | 4.38E+07 | 4.79E+07 |          |          |          |
| 6             | 3.80E+08    | 3.65E+08 | 3.80E+08 | 6.92E+07 | 4.91E+07 | 5.43E+07 |          |          |          |
| 7             | 3.60E+08    | 3.47E+08 | 3.59E+08 | 7.49E+07 | 5.08E+07 | 6.04E+07 |          |          |          |
| 9             | 3.20E+08    | 3.07E+08 | 3.18E+08 | 7.60E+07 | 5.58E+07 | 6.17E+07 |          |          |          |
| 11            | 2.76E+08    | 2.67E+08 | 2.76E+08 | 7.79E+07 | 5.81E+07 | 6.38E+07 |          |          |          |
| 13            | 2.51E+08    | 2.44E+08 | 2.49E+08 | 7.83E+07 | 5.93E+07 | 6.51E+07 |          |          |          |
| 15            | 2.28E+08    | 2.23E+08 | 2.29E+08 | 7.79E+07 | 5.95E+07 | 6.58E+07 |          |          |          |
| 17            | 2.11E+08    | 2.07E+08 | 2.12E+08 | 7.61E+07 | 5.87E+07 | 6.55E+07 |          |          |          |
| 19            | 1.96E+08    | 1.91E+08 | 1.95E+08 | 7.19E+07 | 5.57E+07 | 6.29E+07 |          |          |          |
| 21            | 1.79E+08    | 1.76E+08 | 1.78E+08 | 7.03E+07 | 5.43E+07 | 6.17E+07 |          |          |          |
| 23            | 1.66E+08    | 1.64E+08 | 1.65E+08 | 6.88E+07 | 5.32E+07 | 6.04E+07 |          |          |          |
| 25            | 1.54E+08    | 1.51E+08 | 1.54E+08 | 6.77E+07 | 5.26E+07 | 5.97E+07 |          |          |          |
| 27            | 1.44E+08    | 1.40E+08 | 1.43E+08 | 6.61E+07 | 5.19E+07 | 5.87E+07 |          |          |          |
| 29            | 1.30E+08    | 1.27E+08 | 1.26E+08 | 6.54E+07 | 5.16E+07 | 5.84E+07 |          |          |          |

**Table S3: Tabularized values for Figure 5A**

| Concentration<br>( $\mu\text{M}$ ) | D-luciferin |          |          | AL-1     |          |          | AL-2     |          |          |
|------------------------------------|-------------|----------|----------|----------|----------|----------|----------|----------|----------|
| 0                                  | 7.02E+06    | 1.05E+07 | 5.87E+06 | 3.82E+05 | 3.88E+05 | 3.99E+05 | 1.61E+06 | 4.19E+06 | 3.13E+06 |
| 20                                 | 2.46E+08    | 2.57E+08 | 2.22E+08 | 5.59E+06 | 5.57E+06 | 5.77E+06 | 8.13E+07 | 8.82E+07 | 8.14E+07 |
| 50                                 | 3.19E+08    | 3.55E+08 | 3.57E+08 | 1.09E+07 | 1.11E+07 | 1.09E+07 | 2.08E+08 | 2.06E+08 | 1.95E+08 |
| 75                                 | 3.64E+08    | 3.52E+08 | 3.89E+08 | 1.34E+07 | 1.31E+07 | 1.40E+07 | 2.99E+08 | 2.86E+08 | 2.91E+08 |
| 100                                | 4.91E+08    | 4.78E+08 | 5.20E+08 | 1.37E+07 | 1.42E+07 | 1.49E+07 | 2.87E+08 | 2.69E+08 | 2.80E+08 |
| 150                                | 5.00E+08    | 4.44E+08 | 5.23E+08 | 1.36E+07 | 1.64E+07 | 1.65E+07 | 4.03E+08 | 3.71E+08 | 3.93E+08 |
| 200                                | 4.46E+08    | 4.18E+08 | 5.20E+08 | 1.39E+07 | 1.54E+07 | 1.58E+07 | 4.07E+08 | 3.84E+08 | 3.82E+08 |
| Concentration<br>( $\mu\text{M}$ ) | AL-3        |          |          | AL-4     |          |          |          |          |          |
| 0                                  | 9.60E+05    | 7.69E+05 | 8.56E+05 | 7.17E+05 | 4.96E+05 | 9.44E+05 |          |          |          |
| 20                                 | 1.85E+07    | 2.06E+07 | 1.90E+07 | 2.02E+07 | 1.95E+07 | 1.84E+07 |          |          |          |
| 50                                 | 2.37E+07    | 2.62E+07 | 2.38E+07 | 3.90E+07 | 3.85E+07 | 3.46E+07 |          |          |          |
| 75                                 | 2.83E+07    | 3.00E+07 | 3.13E+07 | 4.65E+07 | 4.13E+07 | 4.07E+07 |          |          |          |
| 100                                | 3.43E+07    | 3.63E+07 | 3.31E+07 | 4.77E+07 | 4.64E+07 | 4.28E+07 |          |          |          |
| 150                                | 3.66E+07    | 3.50E+07 | 3.81E+07 | 4.64E+07 | 4.68E+07 | 4.11E+07 |          |          |          |
| 200                                | 4.38E+07    | 4.21E+07 | 4.74E+07 | 4.78E+07 | 4.08E+07 | 4.38E+07 |          |          |          |

**Table S4: Tabularized values for Figure 5B**

| Time<br>(min) | D-luciferin |          |          | AL-1     |          |          | AL-2     |          |          |
|---------------|-------------|----------|----------|----------|----------|----------|----------|----------|----------|
| 0             | 2.00E+08    | 1.90E+08 | 1.82E+08 | 7.46E+06 | 9.65E+06 | 1.11E+07 | 3.87E+07 | 1.26E+07 | 7.86E+06 |
| 5             | 5.00E+08    | 4.44E+08 | 5.23E+08 | 1.64E+07 | 1.65E+07 | 1.59E+07 | 3.79E+08 | 3.64E+08 | 3.84E+08 |
| 10            | 4.04E+08    | 3.57E+08 | 3.68E+08 | 1.57E+07 | 1.46E+07 | 1.36E+07 | 2.64E+08 | 2.64E+08 | 2.74E+08 |
| 15            | 3.23E+08    | 2.77E+08 | 2.58E+08 | 1.31E+07 | 1.25E+07 | 9.85E+06 | 1.58E+08 | 1.60E+08 | 1.66E+08 |
| 20            | 2.55E+08    | 2.16E+08 | 1.93E+08 | 1.05E+07 | 8.45E+06 | 8.40E+06 | 1.22E+08 | 1.19E+08 | 1.28E+08 |
| 25            | 2.07E+08    | 1.75E+08 | 1.56E+08 | 6.88E+06 | 5.94E+06 | 5.66E+06 | 1.02E+08 | 9.86E+07 | 1.08E+08 |
| 30            | 1.74E+08    | 1.49E+08 | 1.33E+08 | 5.60E+06 | 4.59E+06 | 4.65E+06 | 8.73E+07 | 8.54E+07 | 9.60E+07 |
| 40            | 1.42E+08    | 1.24E+08 | 1.03E+08 | 4.88E+06 | 3.85E+06 | 3.55E+06 | 8.60E+07 | 8.38E+07 | 9.48E+07 |
| 50            | 1.24E+08    | 1.07E+08 | 8.84E+07 | 3.96E+06 | 2.59E+06 | 2.47E+06 | 6.99E+07 | 6.81E+07 | 7.85E+07 |
| Time<br>(min) | AL-3        |          |          | AL-4     |          |          |          |          |          |
| 0             | 3.21E+06    | 5.01E+06 | 7.82E+06 | 1.47E+06 | 7.31E+05 | 1.60E+05 |          |          |          |
| 5             | 3.66E+07    | 3.50E+07 | 3.81E+07 | 4.64E+07 | 4.68E+07 | 4.11E+07 |          |          |          |
| 10            | 2.87E+07    | 2.96E+07 | 2.97E+07 | 3.67E+07 | 3.80E+07 | 3.27E+07 |          |          |          |
| 15            | 2.39E+07    | 2.58E+07 | 2.17E+07 | 2.26E+07 | 2.50E+07 | 1.83E+07 |          |          |          |
| 20            | 1.90E+07    | 2.25E+07 | 1.68E+07 | 1.89E+07 | 2.09E+07 | 1.53E+07 |          |          |          |
| 25            | 1.61E+07    | 2.10E+07 | 1.48E+07 | 1.49E+07 | 1.79E+07 | 1.18E+07 |          |          |          |
| 30            | 1.47E+07    | 1.82E+07 | 1.29E+07 | 1.43E+07 | 1.60E+07 | 1.11E+07 |          |          |          |
| 40            | 1.32E+07    | 1.64E+07 | 1.12E+07 | 1.35E+07 | 1.53E+07 | 9.57E+06 |          |          |          |
| 50            | 9.47E+06    | 1.27E+07 | 8.83E+06 | 1.33E+07 | 1.52E+07 | 1.02E+07 |          |          |          |

**Table S5: Tabularized values for Figure 6B**

| Time<br>(min) | D-luciferin |          |          | AL2      |          |          | AL-3     |          |          |
|---------------|-------------|----------|----------|----------|----------|----------|----------|----------|----------|
|               | 0           | 9.37E+07 | 2.16E+08 | 6.74E+08 | 1.02E+09 | 8.98E+08 | 9.81E+08 | 8.82E+07 | 4.17E+07 |
| 5             | 4.96E+08    | 7.26E+08 | 7.61E+08 | 1.16E+09 | 1.19E+09 | 1.13E+09 | 1.75E+08 | 2.62E+08 | 3.26E+08 |
| 10            | 6.27E+08    | 7.11E+08 | 8.43E+08 | 1.11E+09 | 9.98E+08 | 9.78E+08 | 1.40E+08 | 2.01E+08 | 3.03E+08 |
| 15            | 6.54E+08    | 6.10E+08 | 5.02E+08 | 7.37E+08 | 8.77E+08 | 8.35E+08 | 8.97E+07 | 9.86E+07 | 2.56E+08 |
| 20            | 2.91E+08    | 5.33E+08 | 2.11E+08 | 6.64E+08 | 7.70E+08 | 7.52E+08 | 5.03E+07 | 6.08E+07 | 2.11E+08 |
| 25            | 2.35E+08    | 3.69E+08 | 2.68E+08 | 6.27E+08 | 5.19E+08 | 6.13E+08 | 4.94E+07 | 4.17E+07 | 1.65E+08 |
| 30            | 3.24E+08    | 2.16E+08 | 1.72E+08 | 5.53E+08 | 5.08E+08 | 5.43E+08 | 3.32E+07 | 2.90E+07 | 1.36E+08 |
| 40            | 1.55E+08    | 1.93E+08 | 8.64E+07 | 4.15E+08 | 4.65E+08 | 4.45E+08 | 2.29E+07 | 2.06E+07 | 1.01E+08 |
| 50            | 1.87E+08    | 1.27E+08 | 6.42E+07 | 2.89E+08 | 3.16E+08 | 2.91E+08 | 2.77E+07 | 9.44E+06 | 6.78E+07 |
| 60            | 1.76E+08    | 7.53E+07 | 4.58E+07 | 2.40E+08 | 2.19E+08 | 2.23E+08 | 1.81E+07 | 6.35E+06 | 1.03E+07 |
| Time<br>(min) | AL-4        |          |          |          |          |          |          |          |          |
|               | 0           | 3.99E+07 | 9.56E+06 | 7.93E+06 |          |          |          |          |          |
| 5             | 4.12E+07    | 1.44E+07 | 1.01E+07 |          |          |          |          |          |          |
| 10            | 4.44E+07    | 1.44E+07 | 6.46E+06 |          |          |          |          |          |          |
| 15            | 2.10E+07    | 1.11E+07 | 4.85E+06 |          |          |          |          |          |          |
| 20            | 1.72E+07    | 9.68E+06 | 4.44E+06 |          |          |          |          |          |          |
| 25            | 2.08E+07    | 6.26E+06 | 4.27E+06 |          |          |          |          |          |          |
| 30            | 2.10E+07    | 3.78E+06 | 4.11E+06 |          |          |          |          |          |          |
| 40            | 1.73E+07    | 1.23E+06 | 3.47E+06 |          |          |          |          |          |          |
| 50            | 1.29E+07    | 2.97E+06 | 3.21E+06 |          |          |          |          |          |          |
| 60            | 9.79E+06    | 3.19E+06 | 3.04E+06 |          |          |          |          |          |          |

**Table S6: Tabularized values for Figure 6C**

| Photon Flux<br>(photons s <sup>-1</sup> ) | AL2     |          |          | D-luciferin |          |          |
|-------------------------------------------|---------|----------|----------|-------------|----------|----------|
|                                           | 1.5E+09 | 1.16E+09 | 1.19E+09 | 1.13E+09    | 4.96E+08 | 7.26E+08 |

**NMR, ESI-HRMS and HPLC spectra****HPLC spectra**

AL1

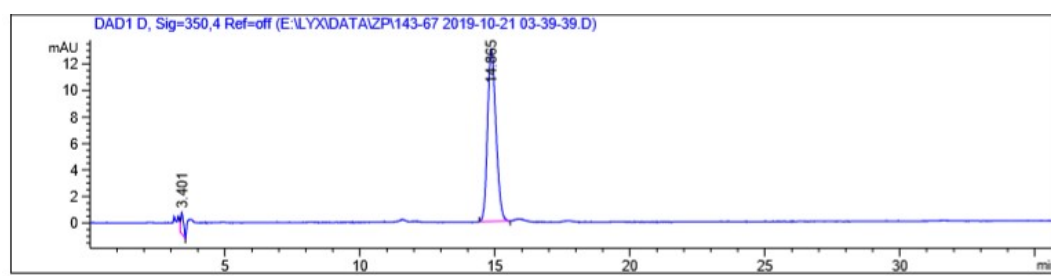

AL2

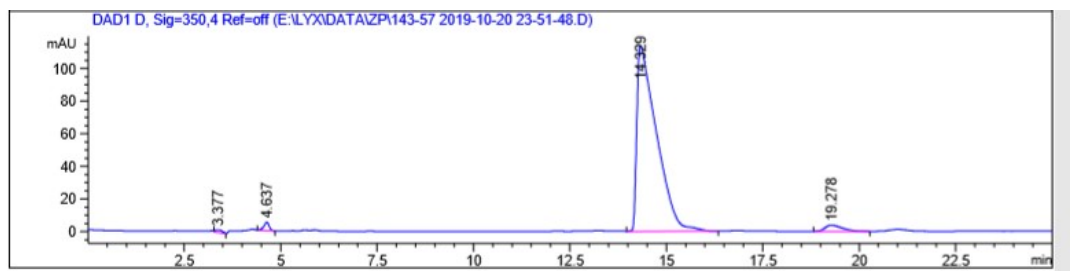

AL3

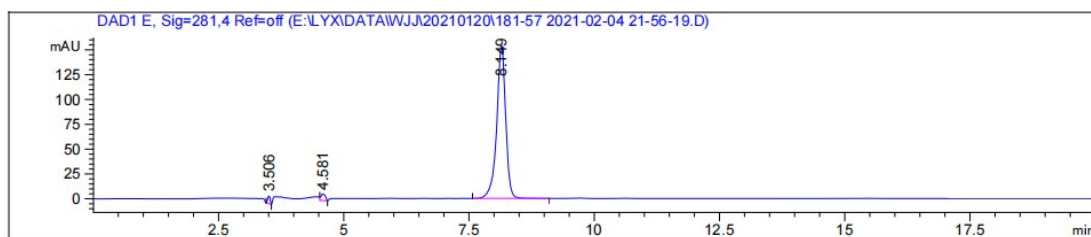

AL4

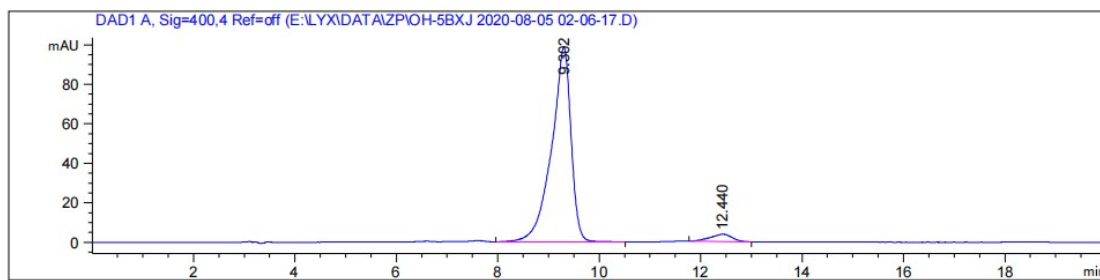

**NMR and ESI-HRMS spectra**

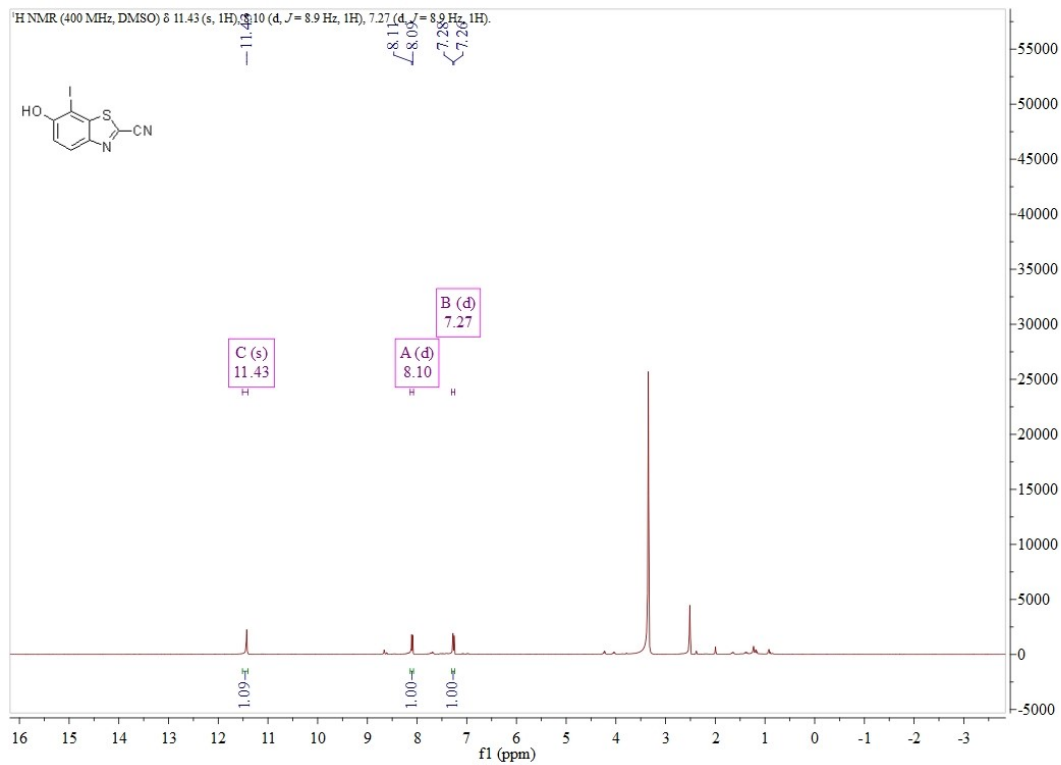

2019051019\_SDUL-1 #62 RT: 0.19 AV: 1 NL: 1.77E4  
 T: ITMS-c ESI Full ms [50.00-1000.00]

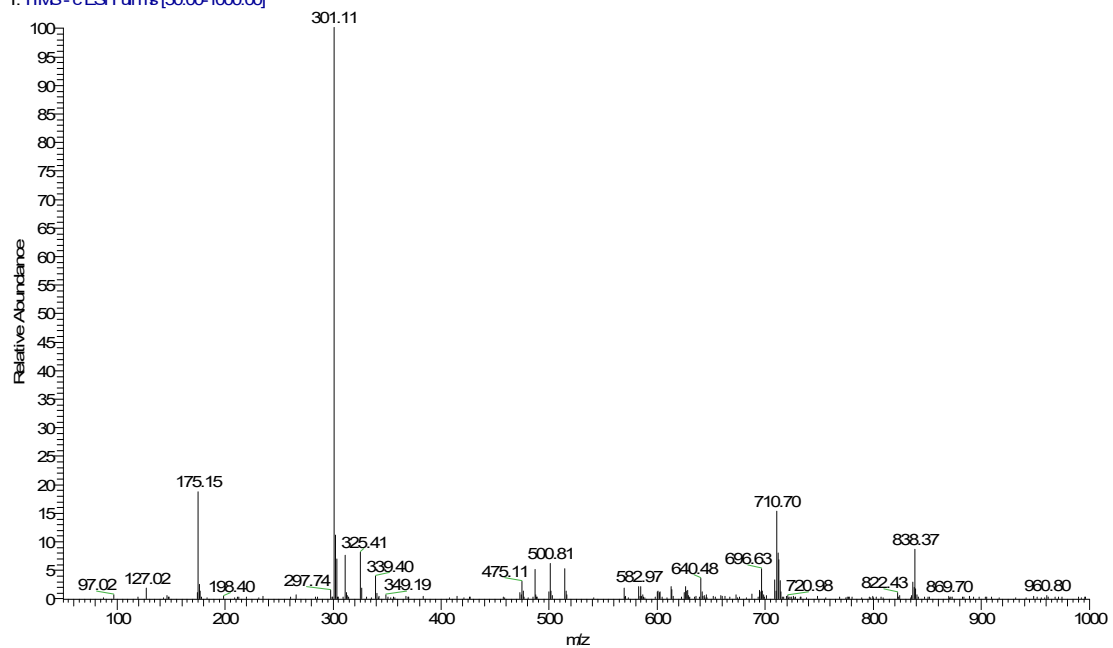

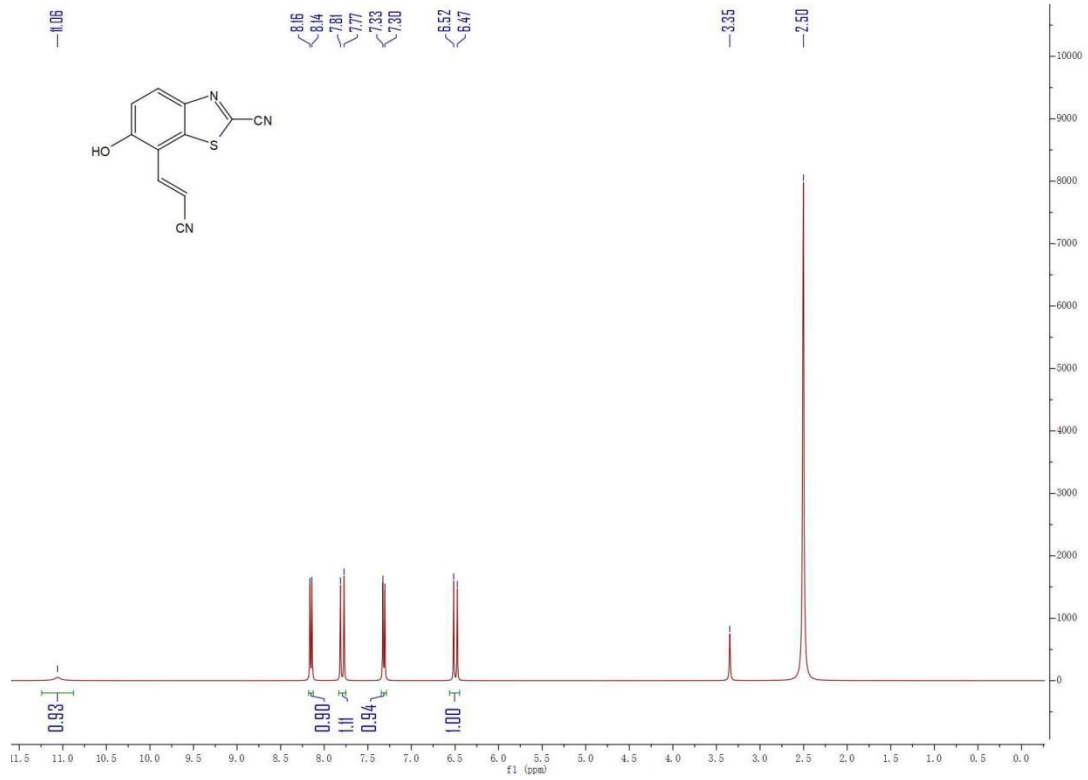

2021030921\_SDUL-143-74 #99 RT: 0.43 AV: 1 NL: 3.22E2  
 T: ITIMS - c ESI Full ms [50.00-2000.00]

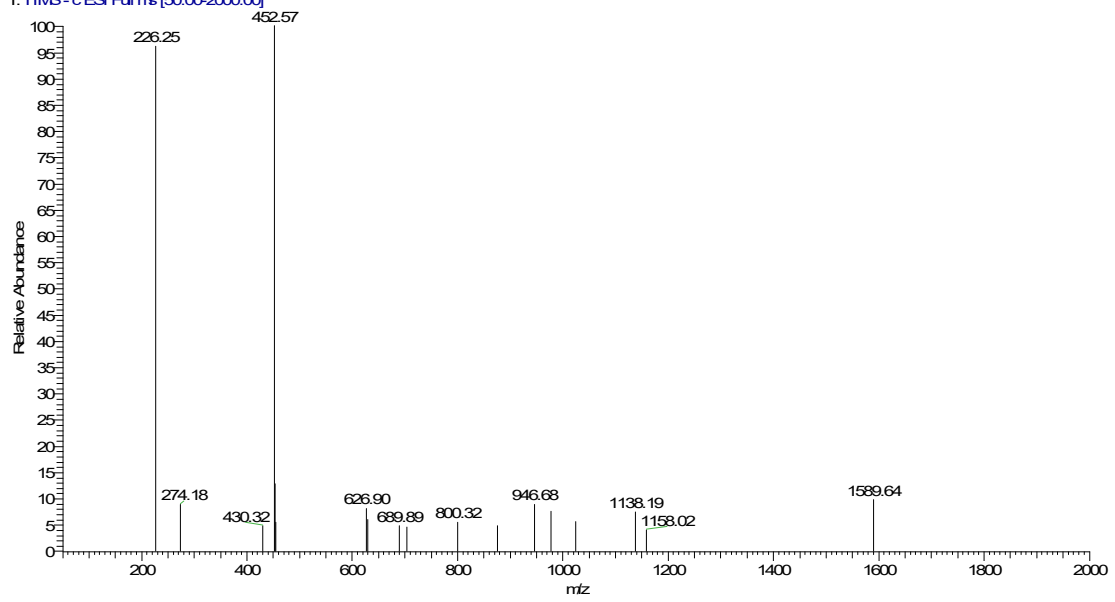

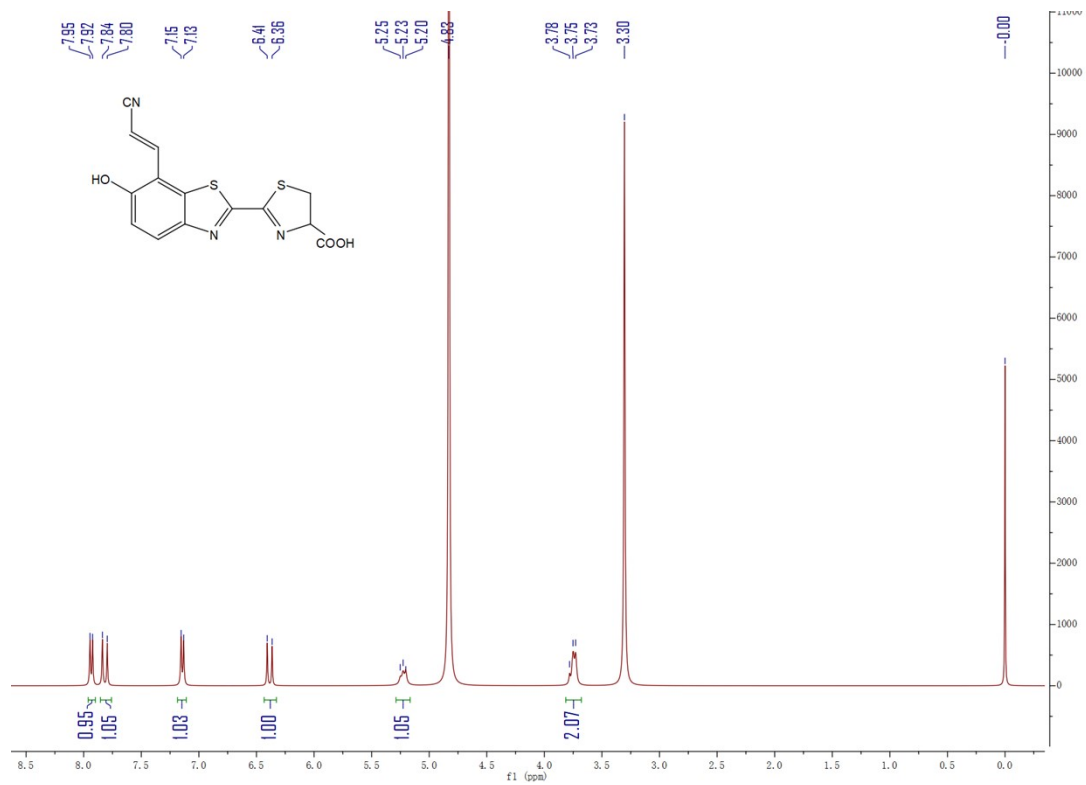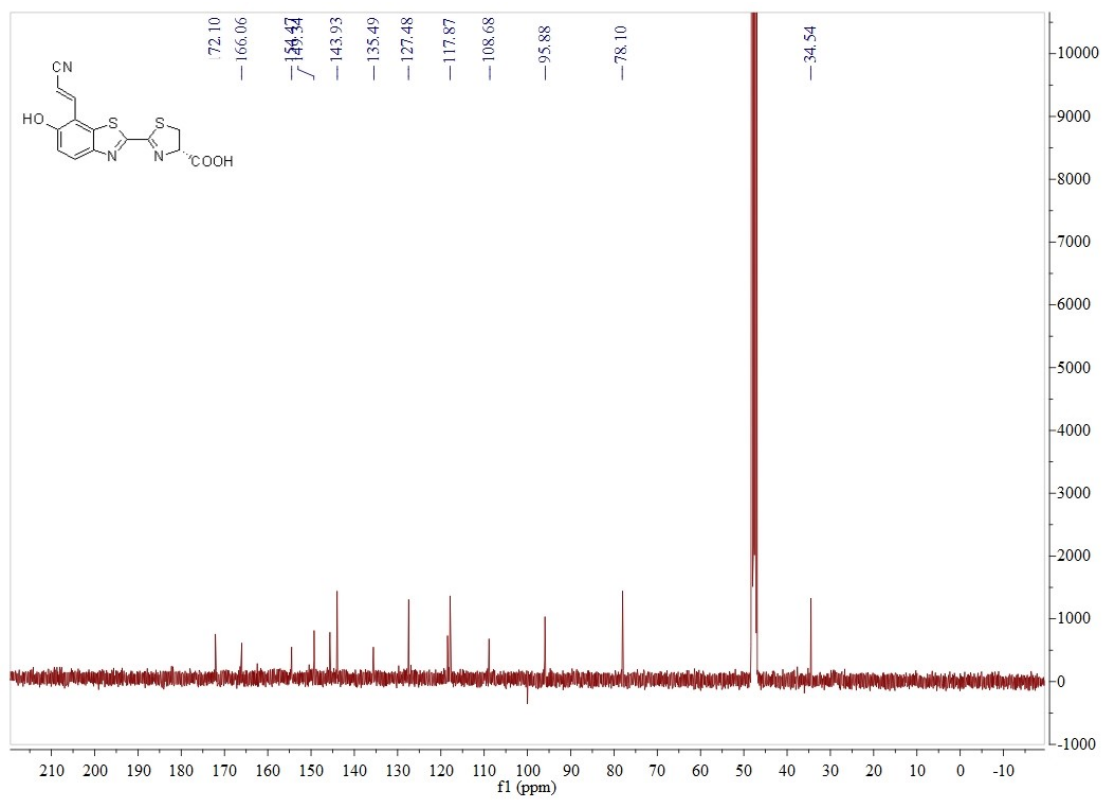



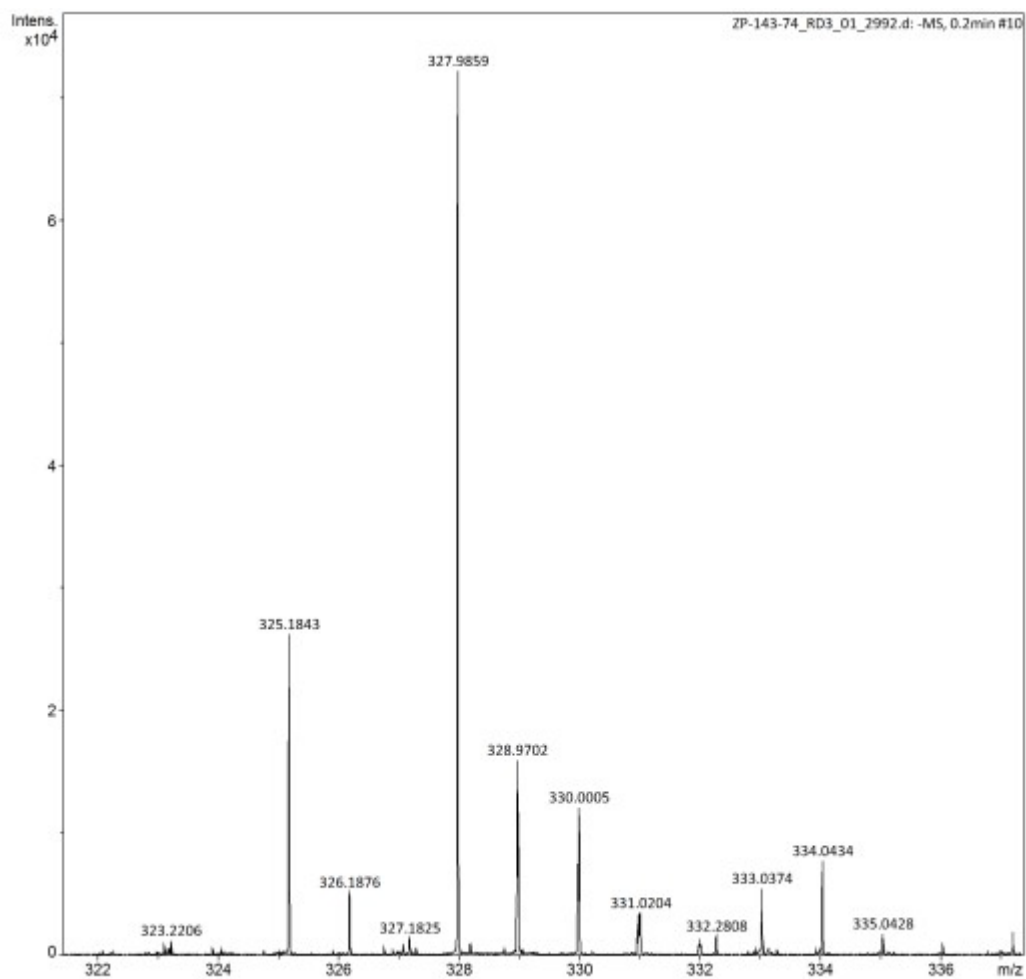

2021051827 SDU-143-75 #29 RT: 0.12 AV: 1 NL: 1.37E4  
 T: ITIMS-c ESI Full ms [150.00-2000.00]

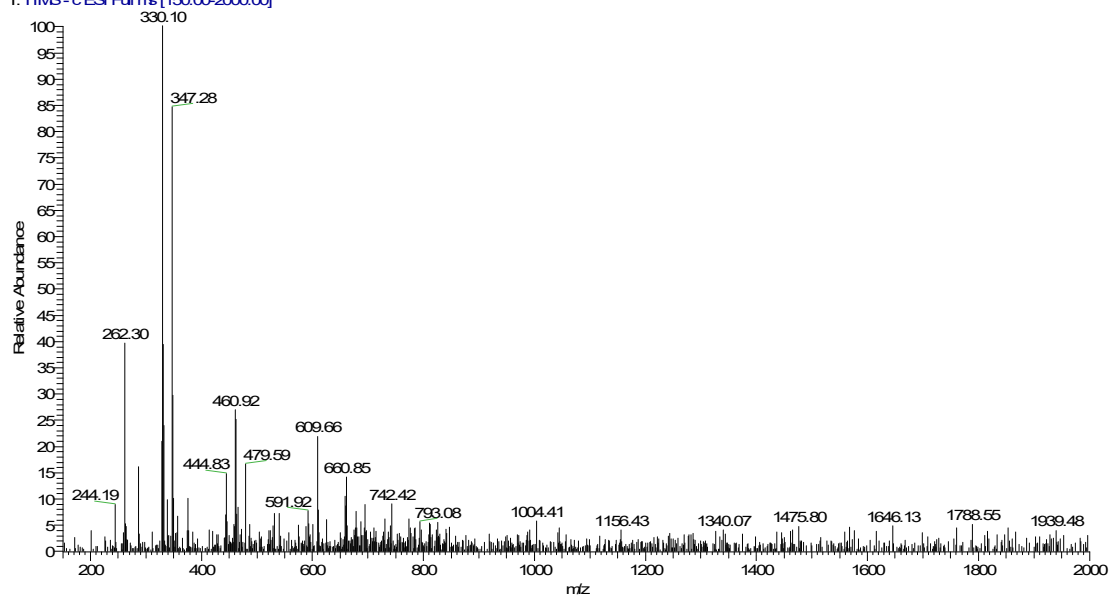

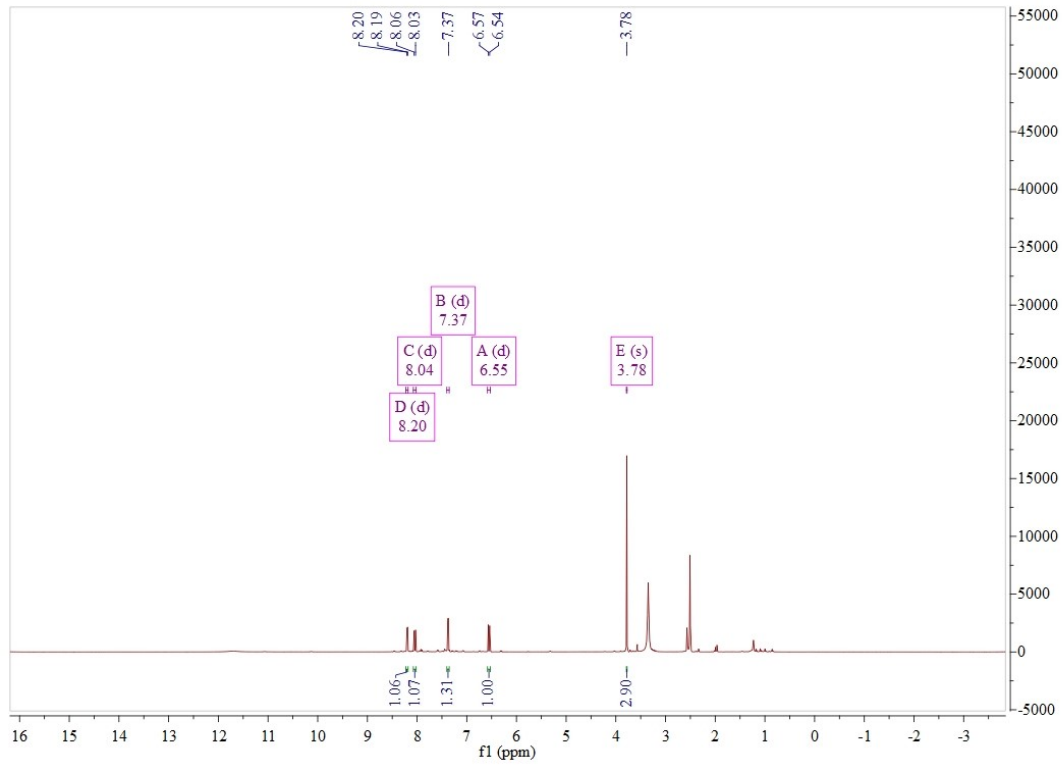

2020100819\_SDL-1 #80 RT: 0.34 AM: 1 NL: 204E4  
 T: ITMS -c ESI Full ms [150.00-2000.00]

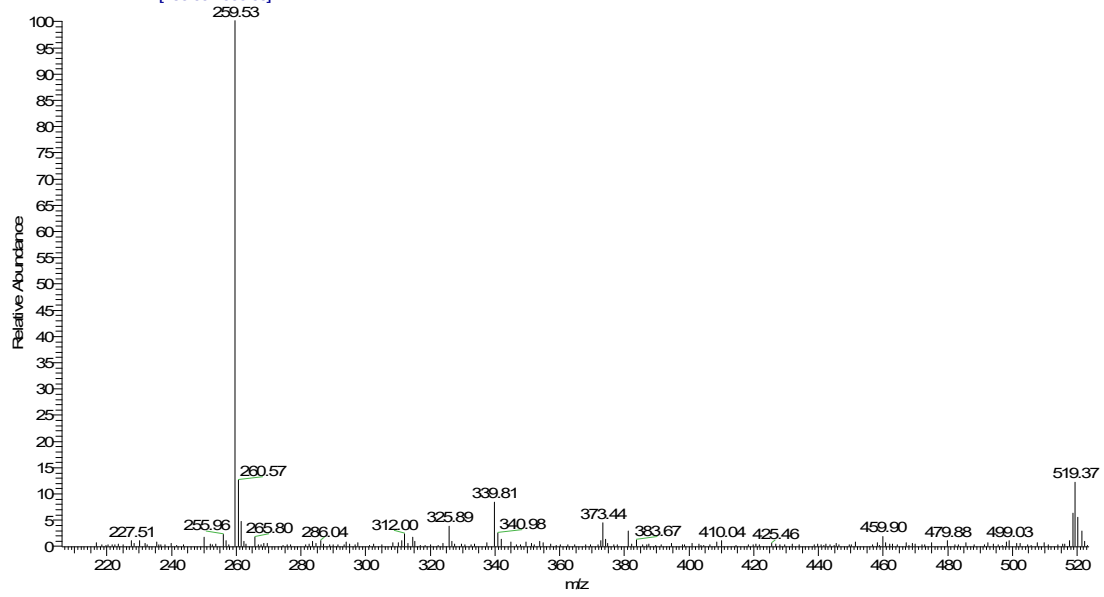

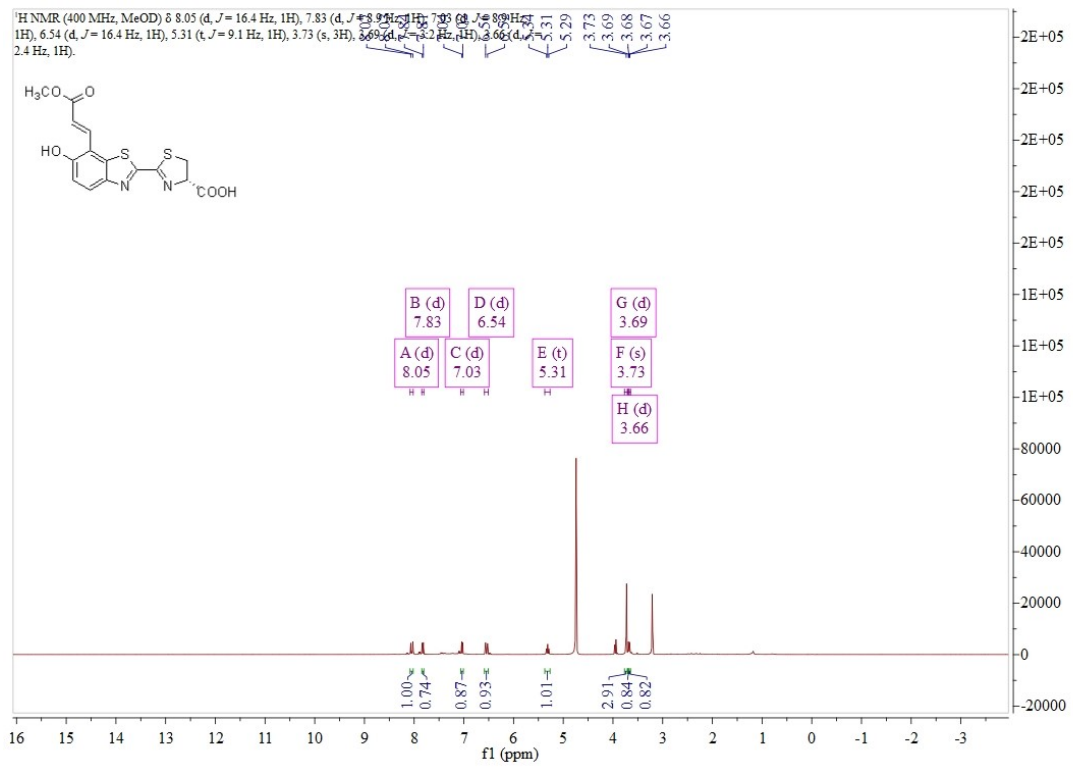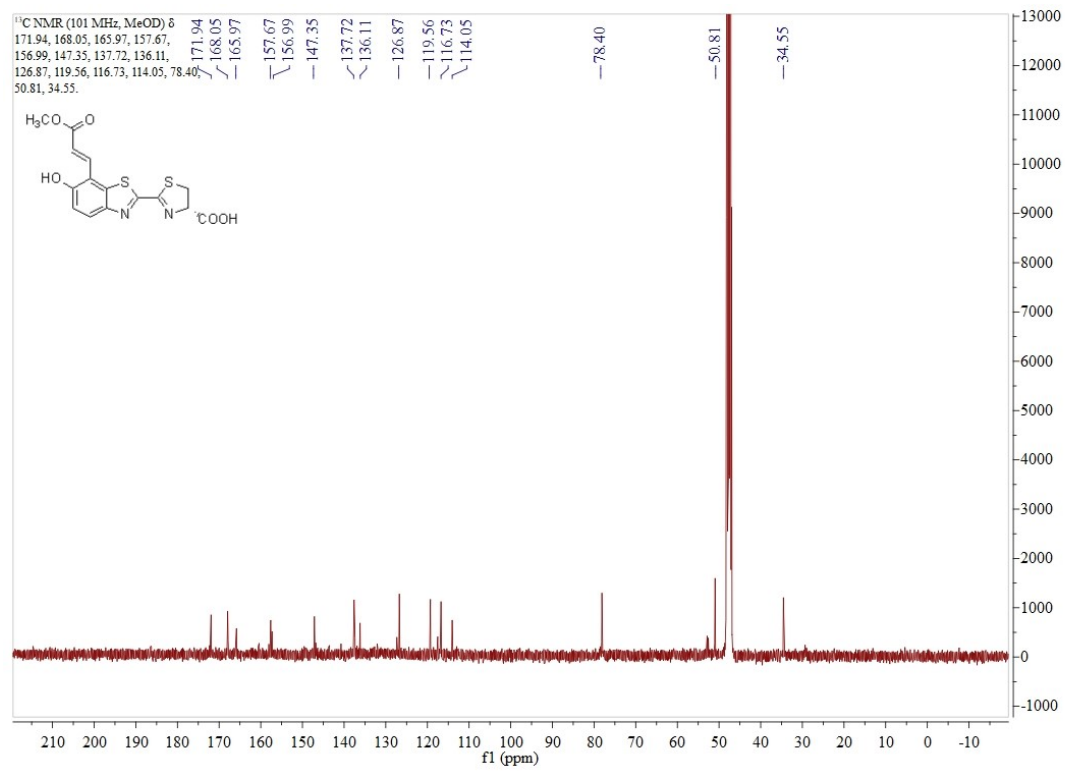

Tests\202103\143-57-

3/4/2021 7:24:58 PM

#58-64 RT: 0.33-0.36 AV: 7 SB: 12 0.11-0.18 NL: 7.84E6  
S + c ESI Full ms [100.00-1000.00]

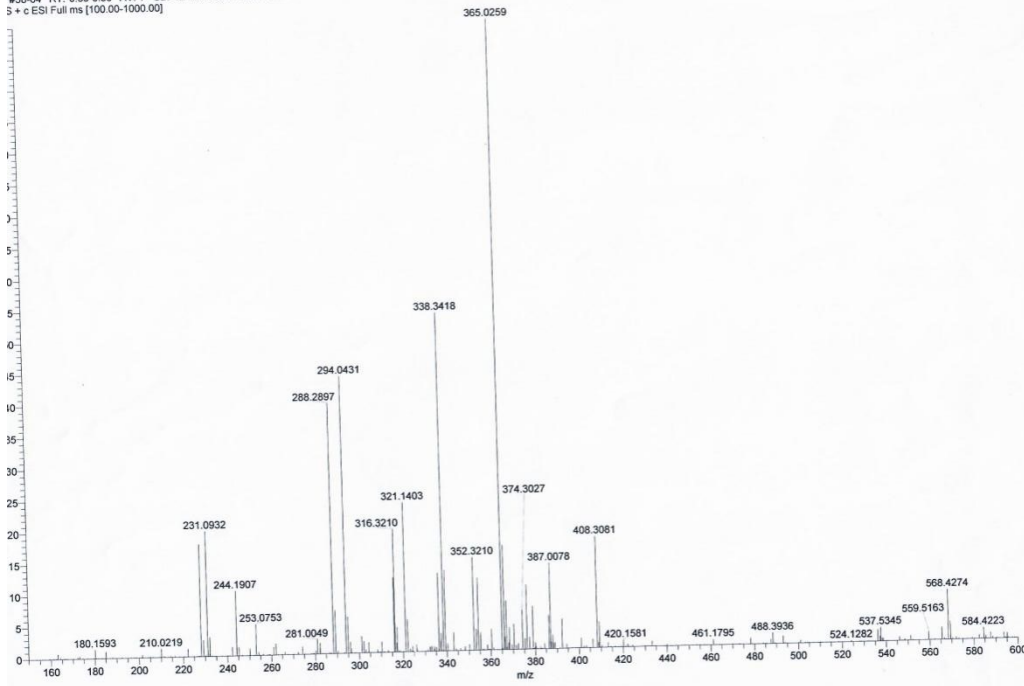

2019052516\_SDU-143-57 #221 RT: 0.83 AV: 1 NL: 7.31E2  
T: ITMS - c ESI Full ms [50.00-1000.00]

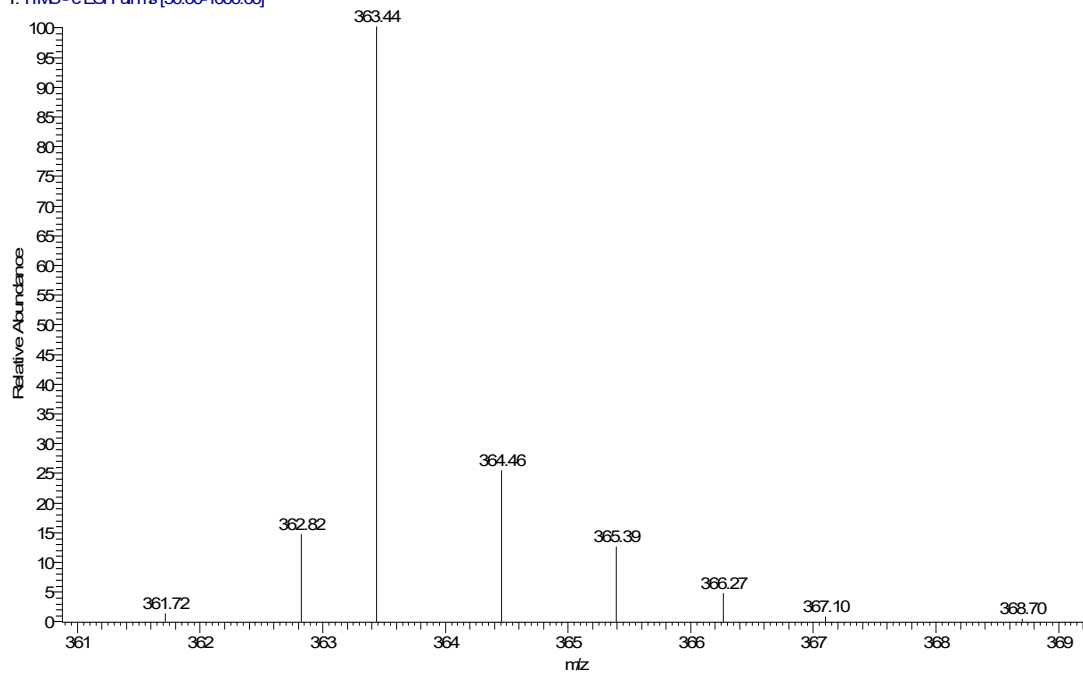

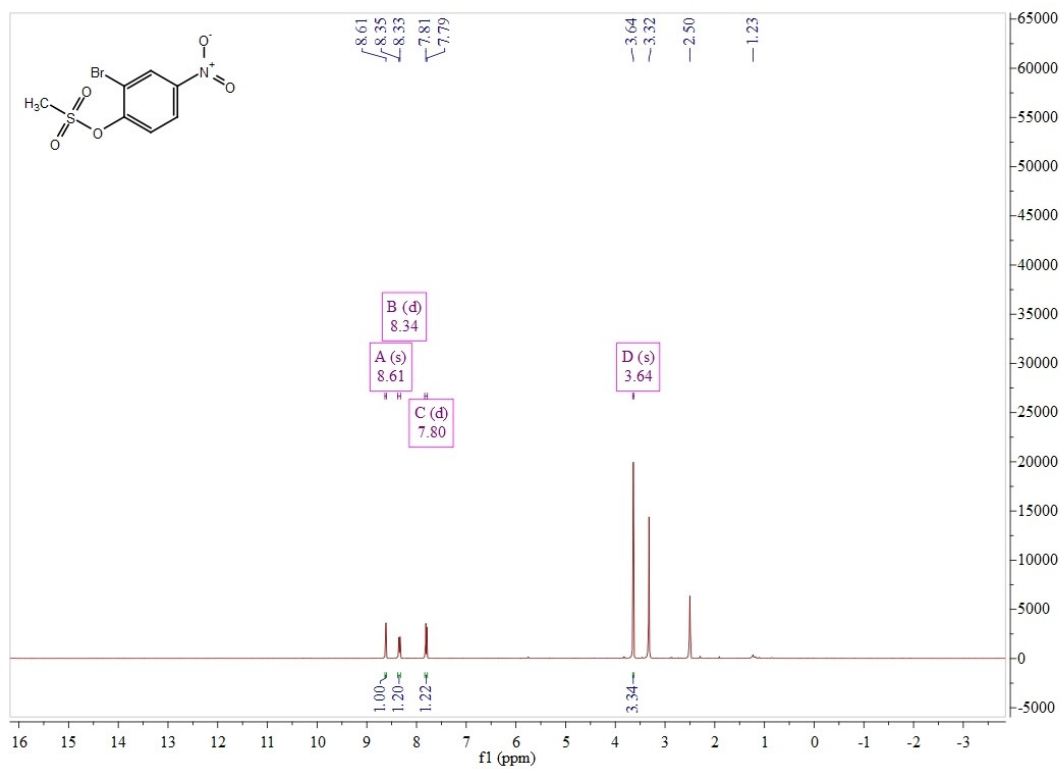

2021032532 SDU-143-56 #21 RT: 0.05 AV: 1 NL: 1.37E3  
 T: ITMS + c ESI Full ms [50.00-600.00]

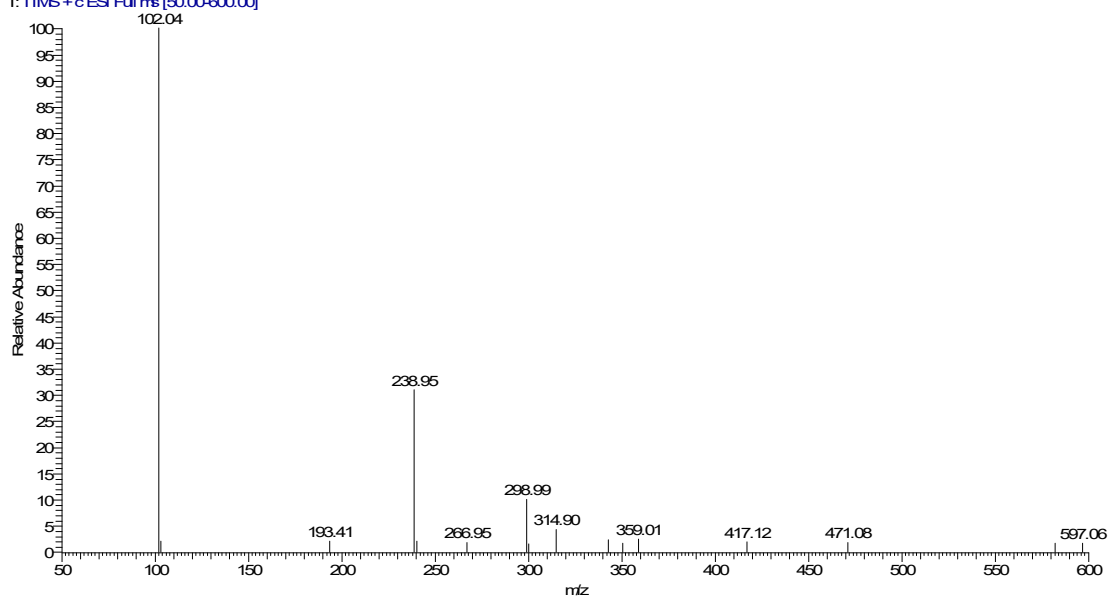

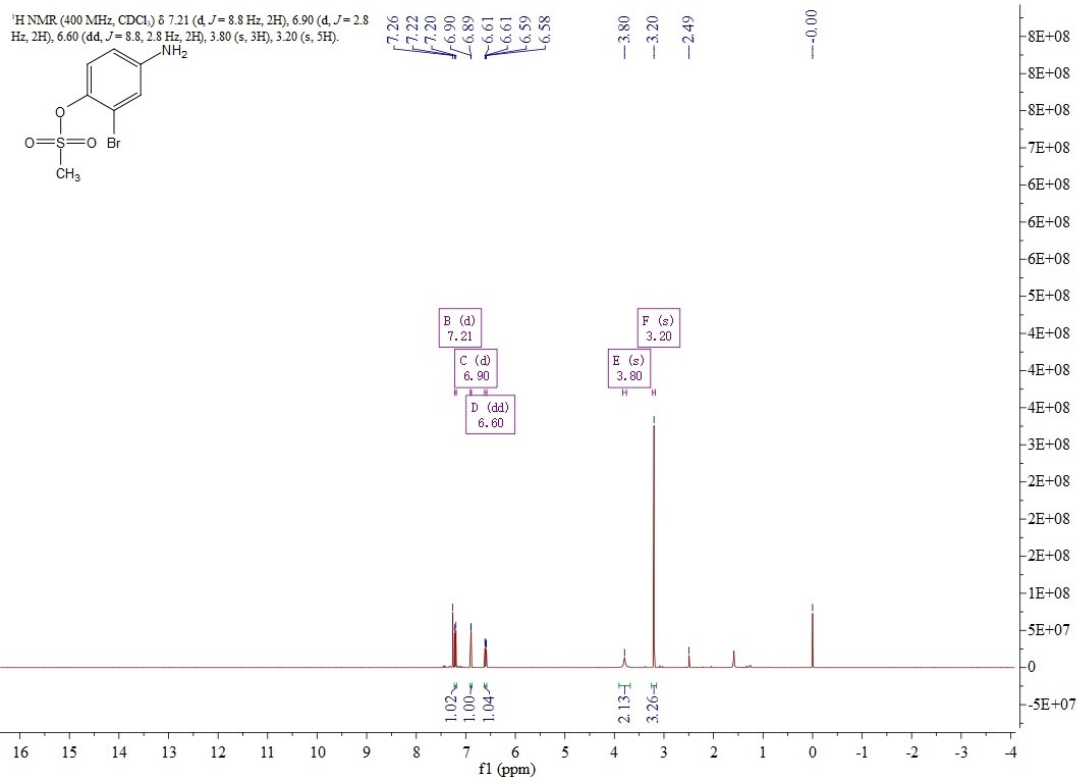

2021031154\_SDL-A #119 RT: 0.52 AV: 1 NL: 4.49E2  
T: ITMS + c ESI Full ms [50.00-2000.00]

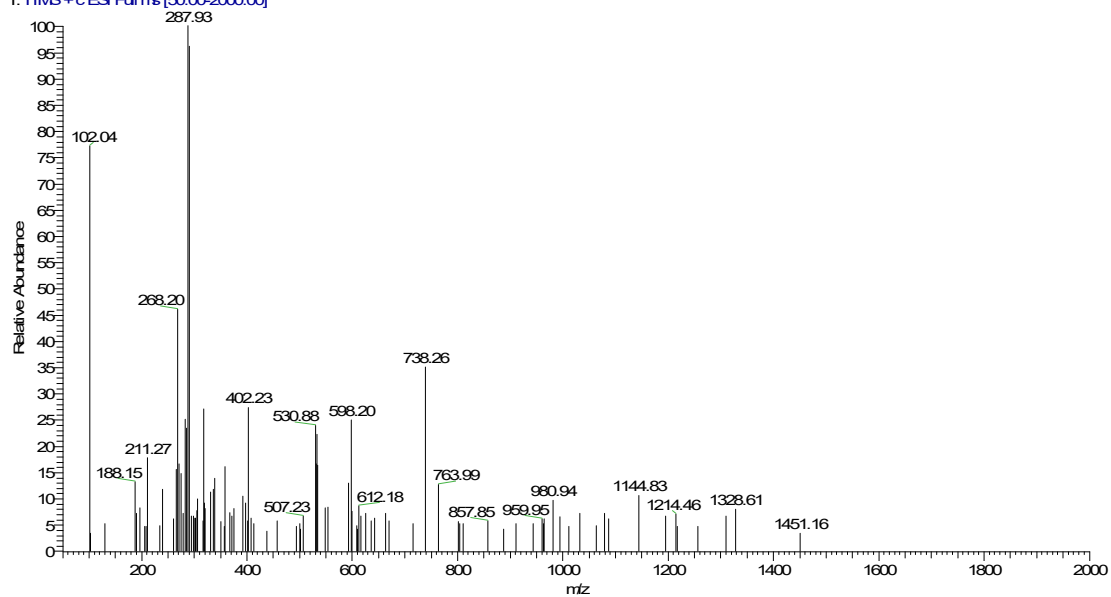

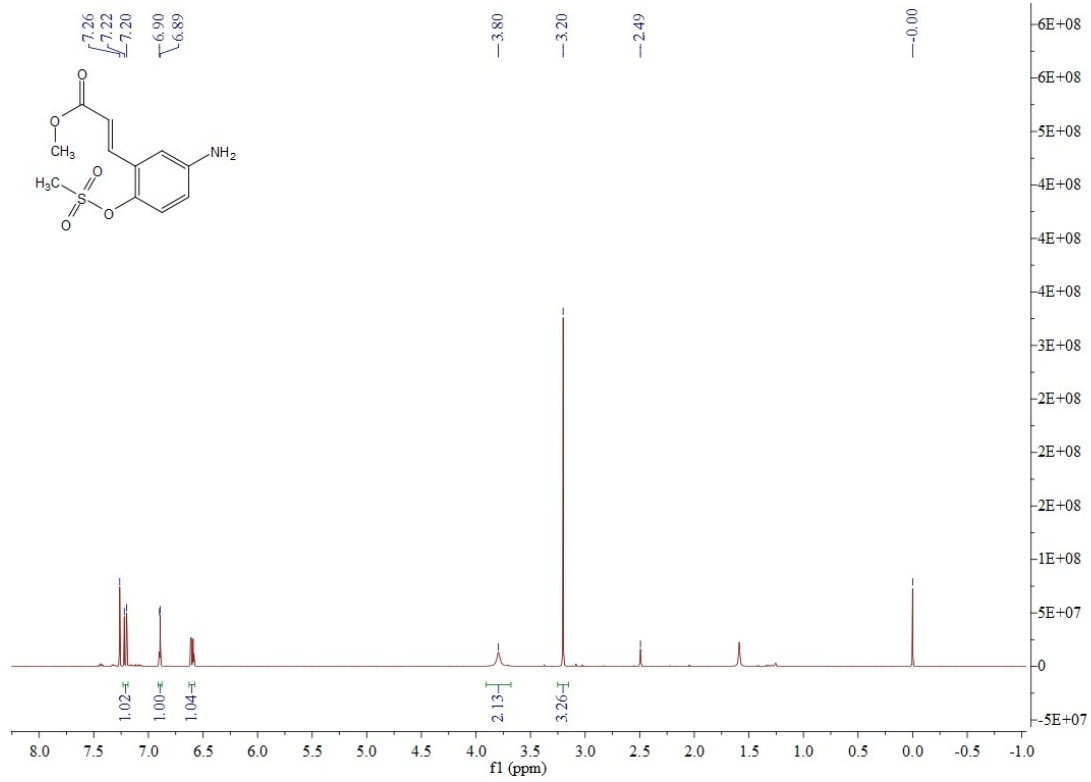

2020121744\_SDU-181-07 #176 RT: 0.74 AV: 1 NL: 6.04E4  
T: ITMS+c ESI Full ms [150.00-2000.00]

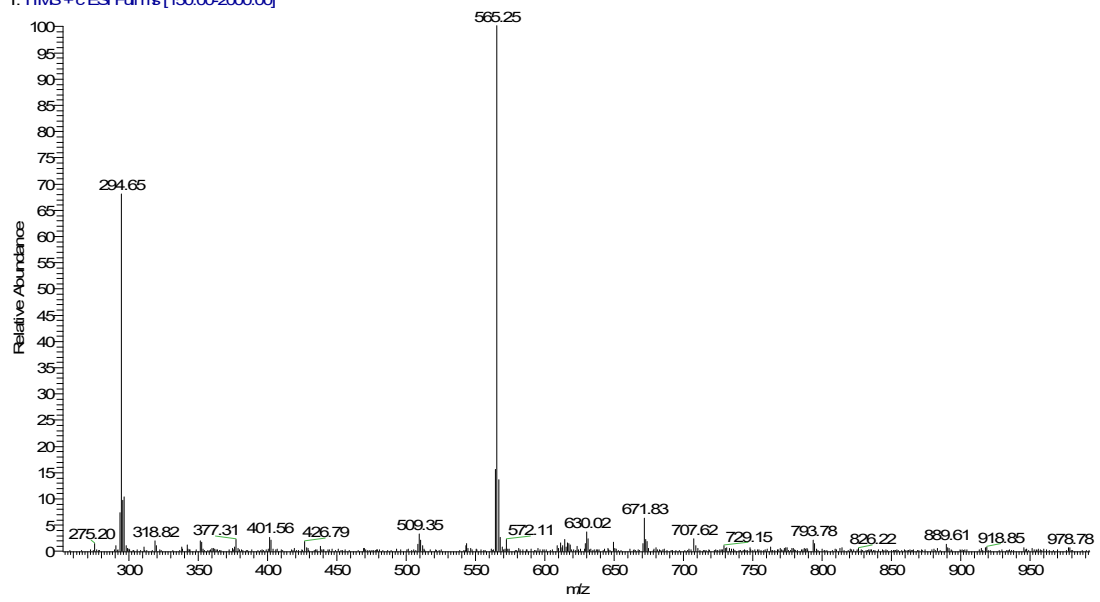

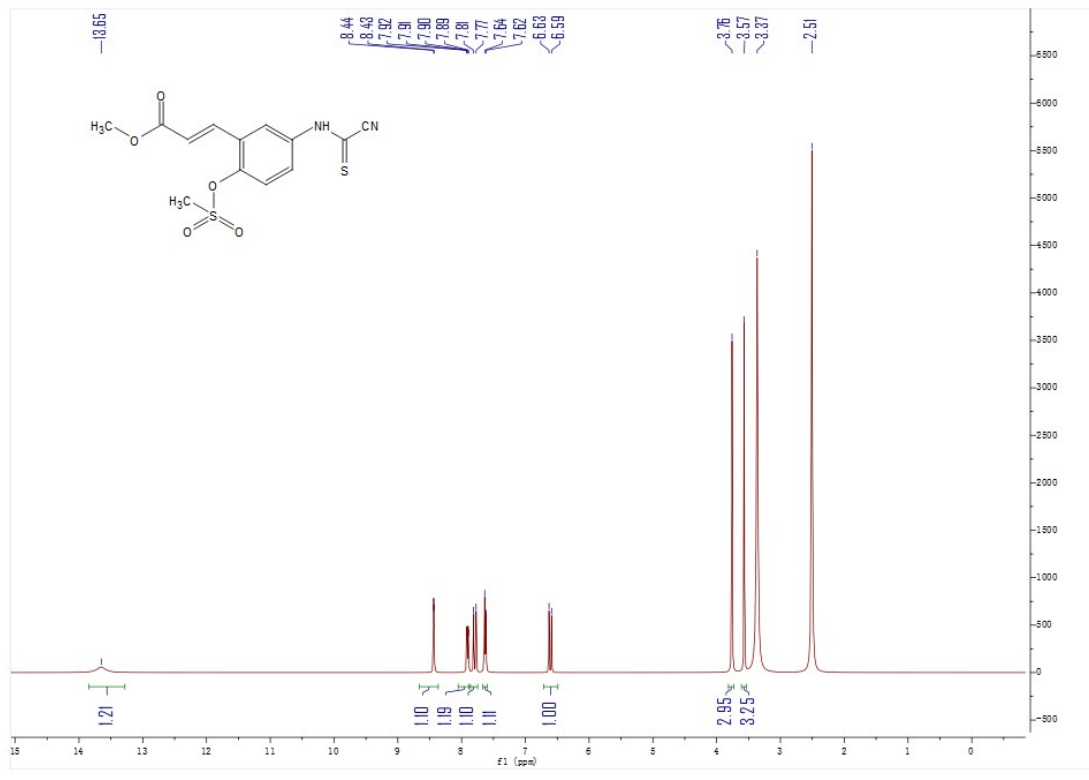

2020121736 SDUL-181-09 #162 RT: 0.69 AV: 1 NL: 1.26E4  
 T: ITMS-c ESI Full ms [150.00-2000.00]

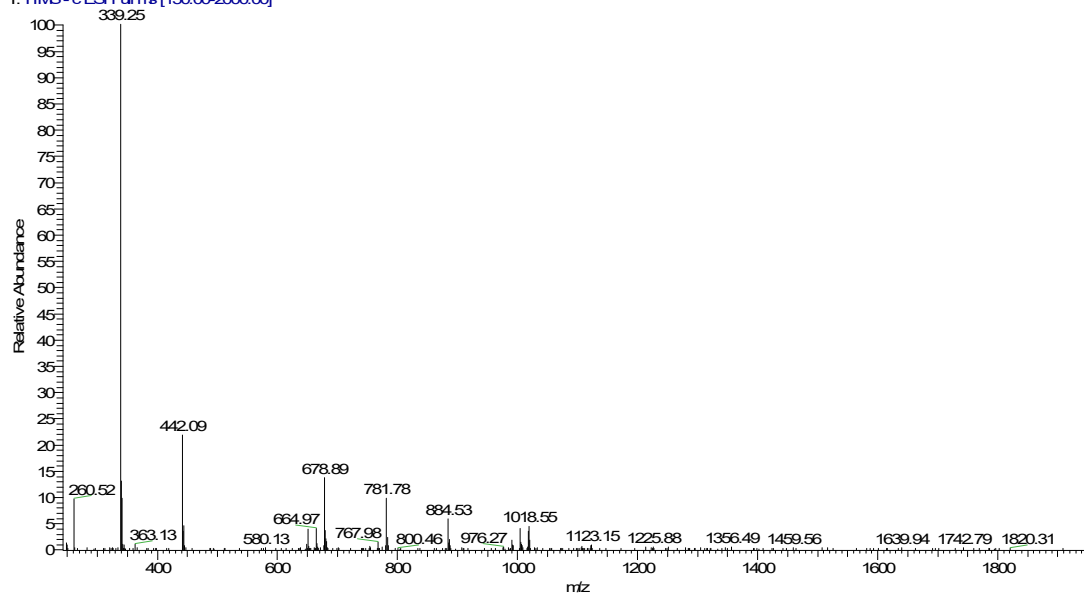



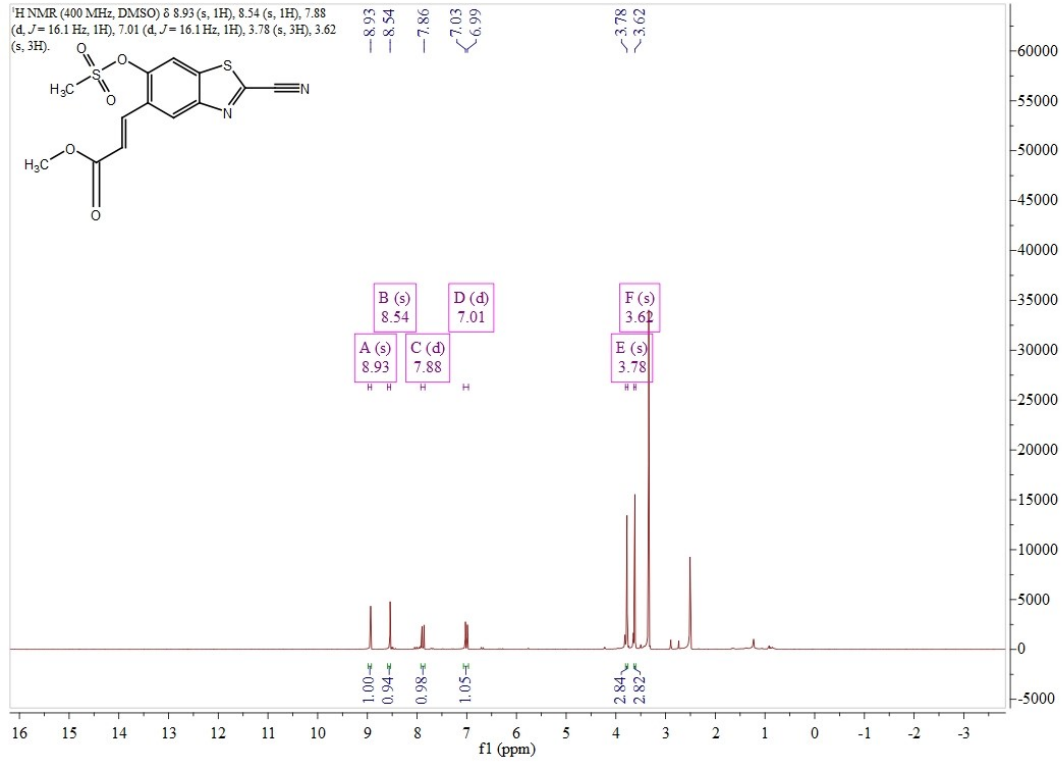

2021011431\_SDUL-181-1C #564 RT: 2.40 AV: 1 NL: 2.90EB  
T: ITMS + c ESI Full ms [150.00-2000.00]

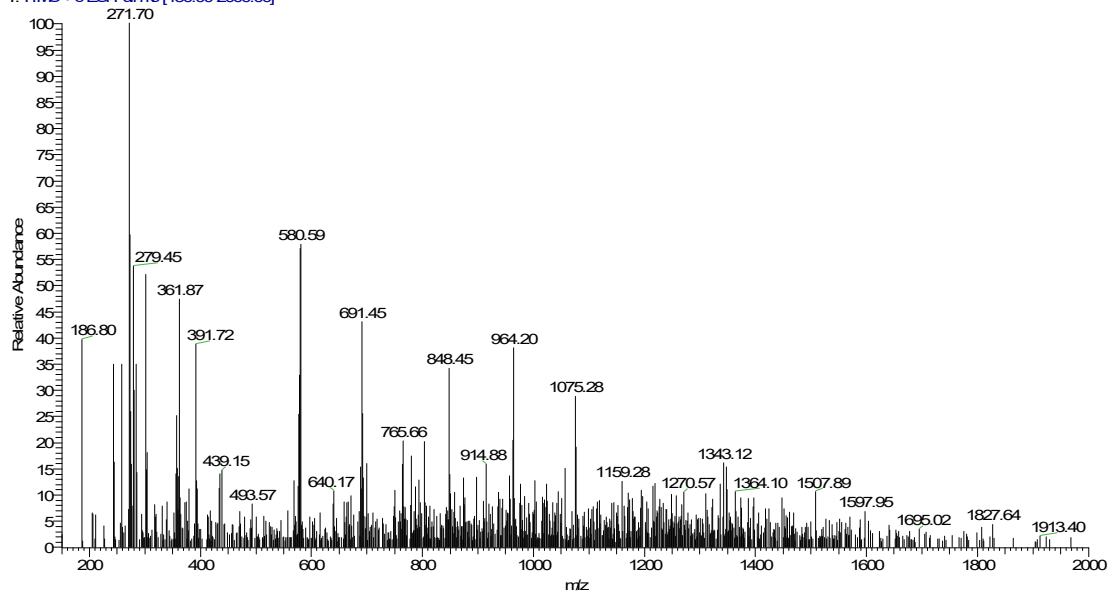

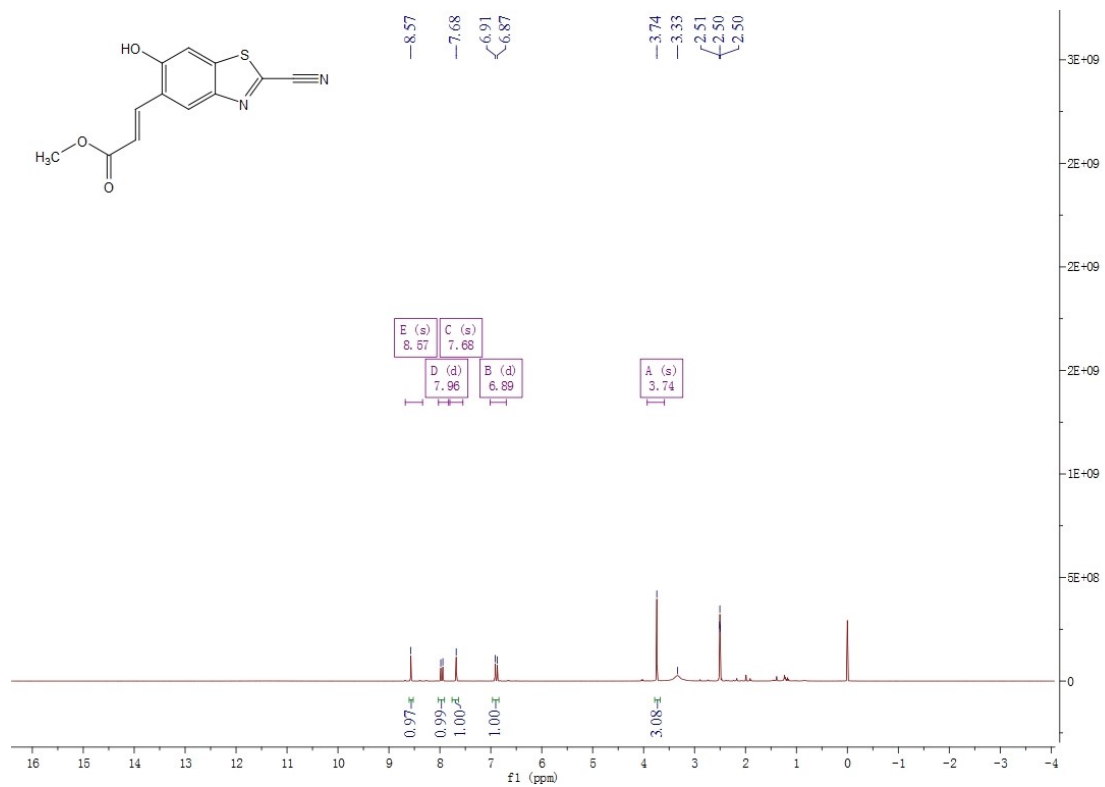

2020100819\_SDU-1 #80 RT: 0.34 AM: 1 NL: 204E4  
 T: ITMS - c ESI Full ms [150.00-2000.00]

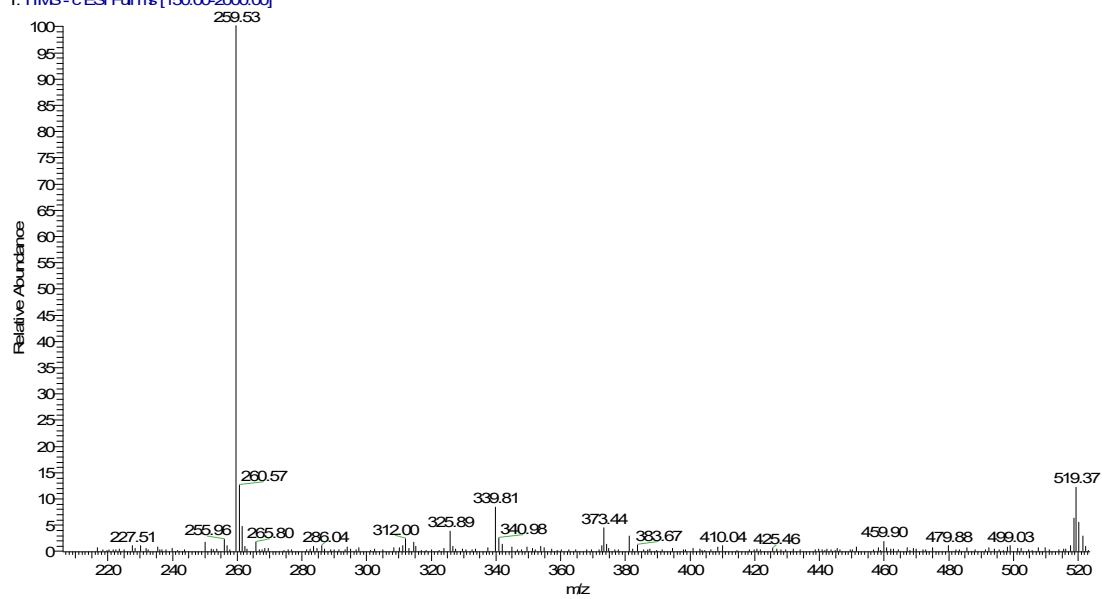

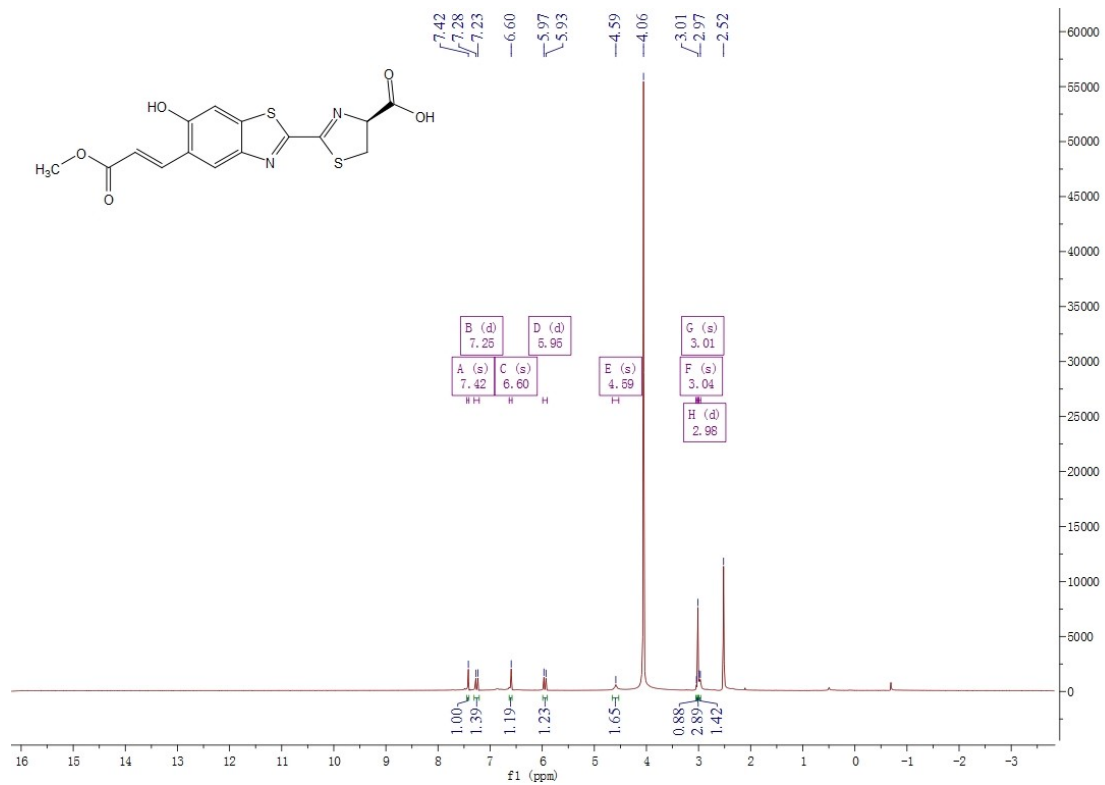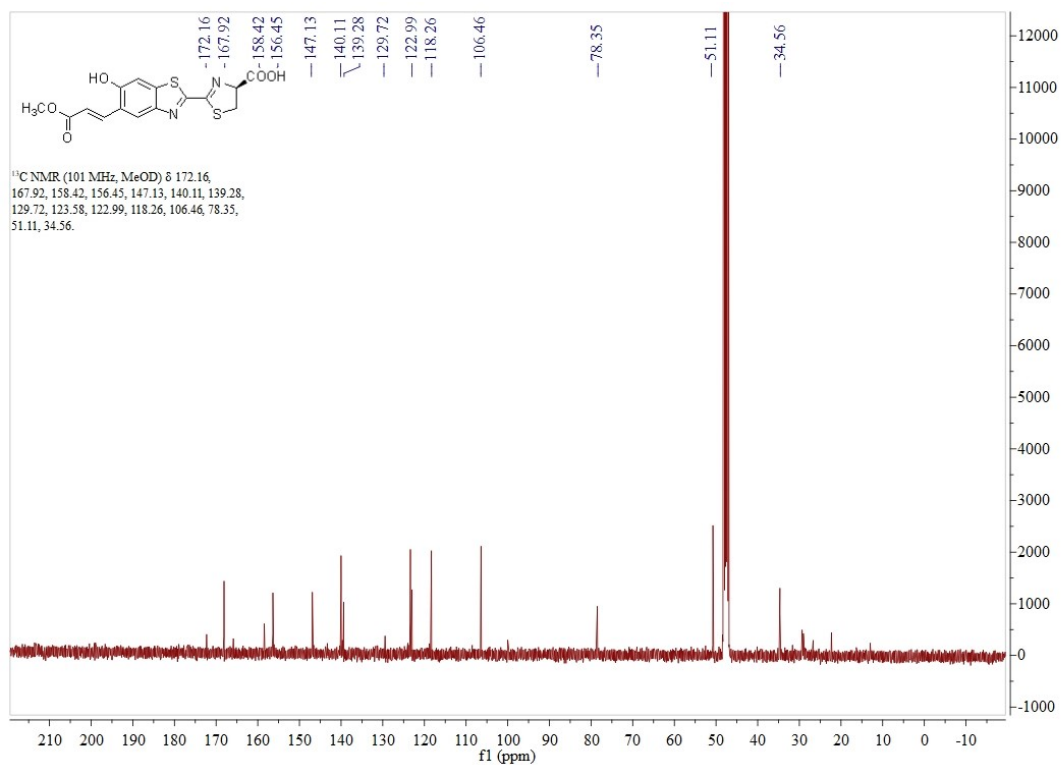

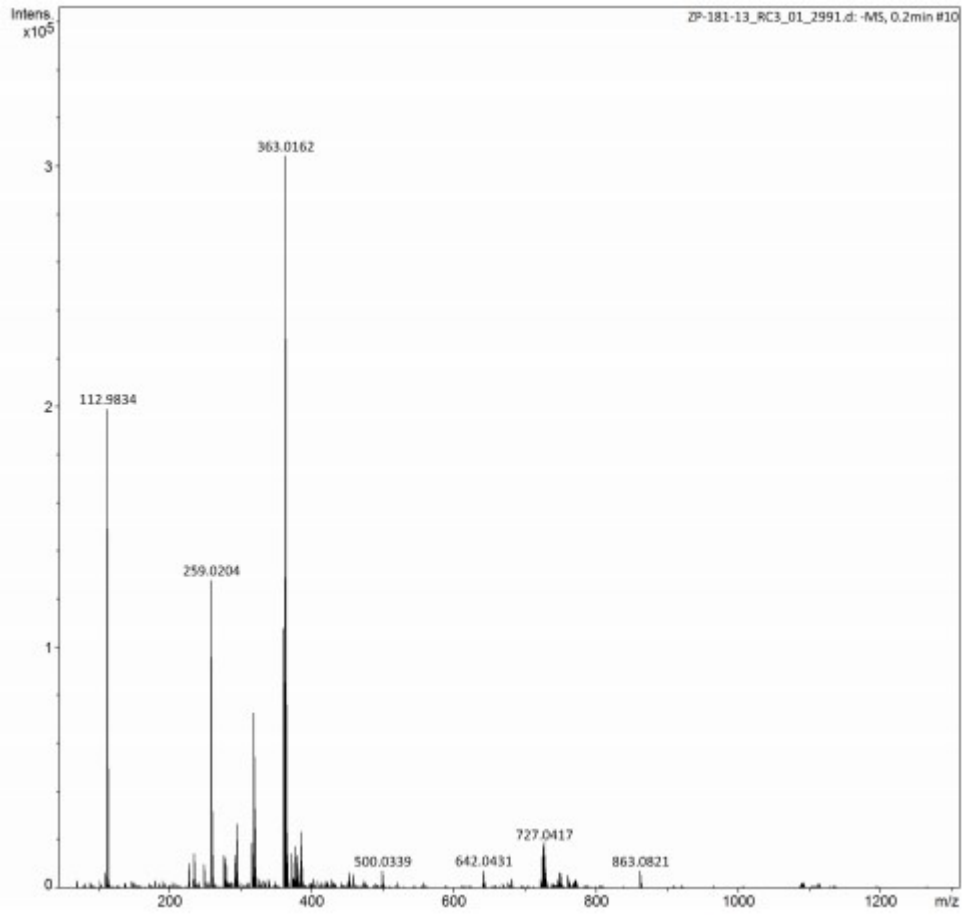

2020080623\_SDU-181-60 #869 RT: 2.62 AM: 1 NL: 1.92E3  
 T: FTMS + c ESI Full ms [50.00-1000.00]

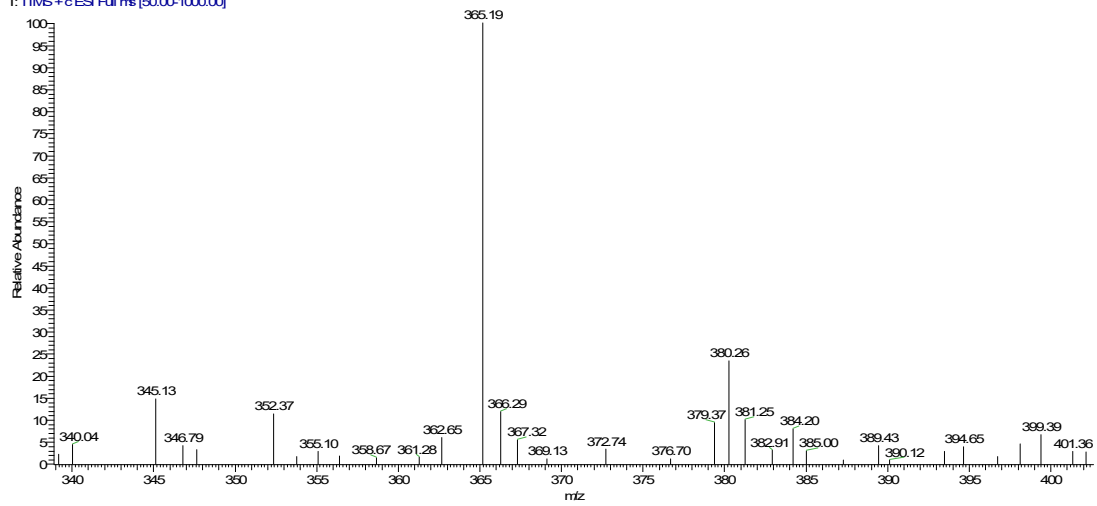

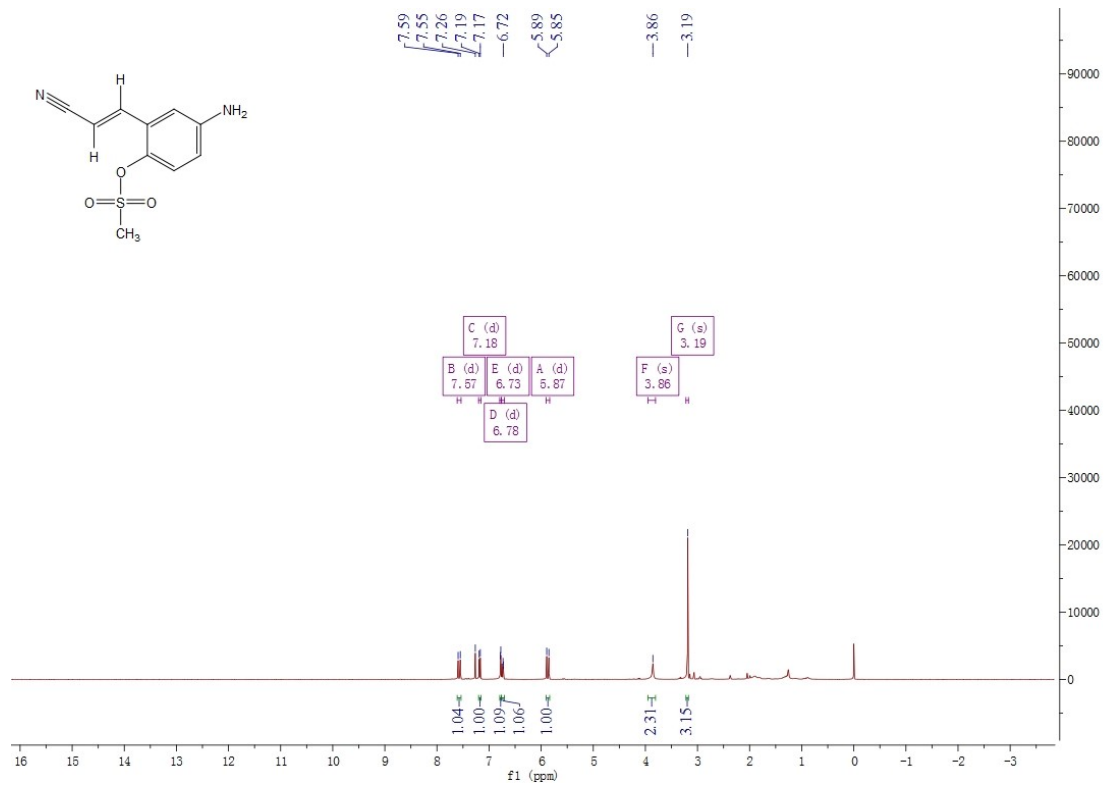

2020030319 SDU-181-25 #1366 RT: 4.04 AV: 1 NL: 2.16E4  
 T: ITMS + c ESI Full ms [150.00-1200.00]

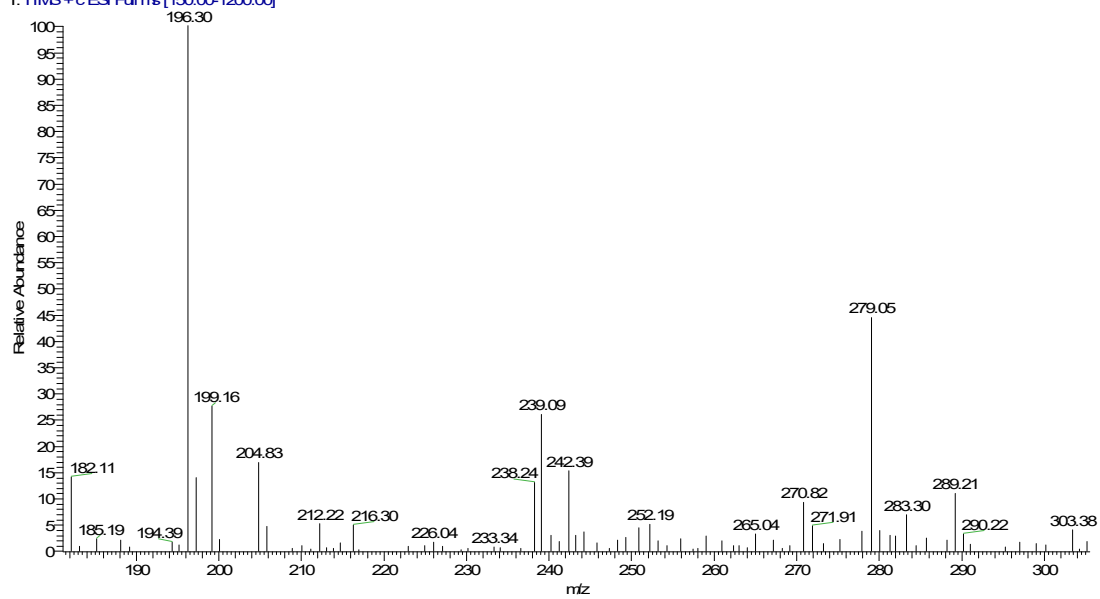

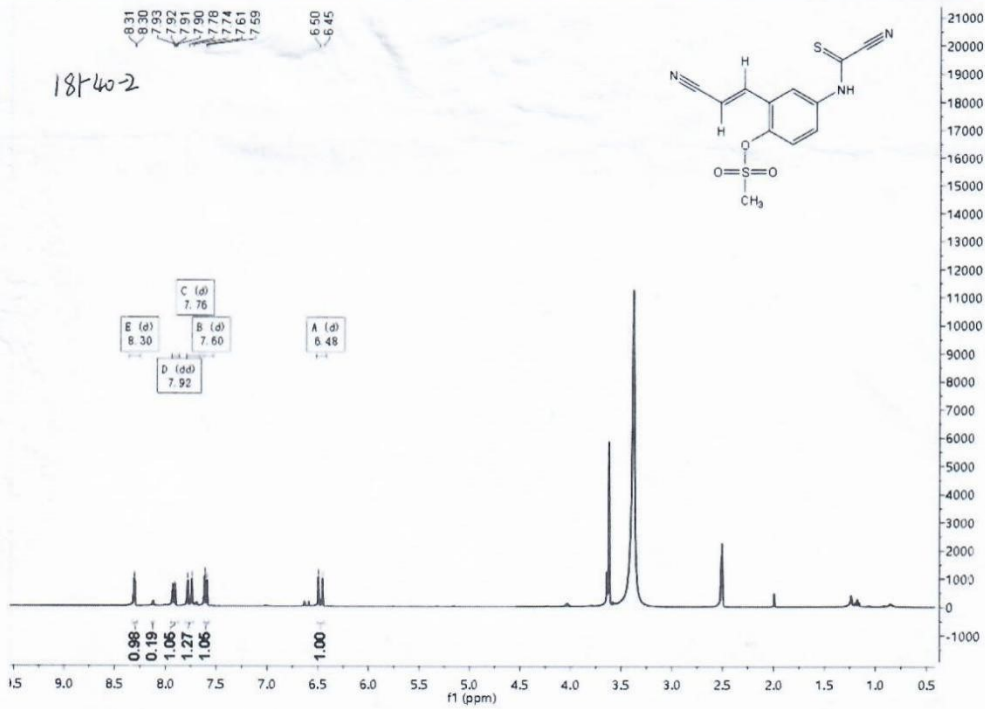

2020090321 SDLL-181-4C #1325 RT: 3.98 AV: 1 NL: 3.84E4  
 T: ITMS-c ESI Full ms [150.00-1200.00]

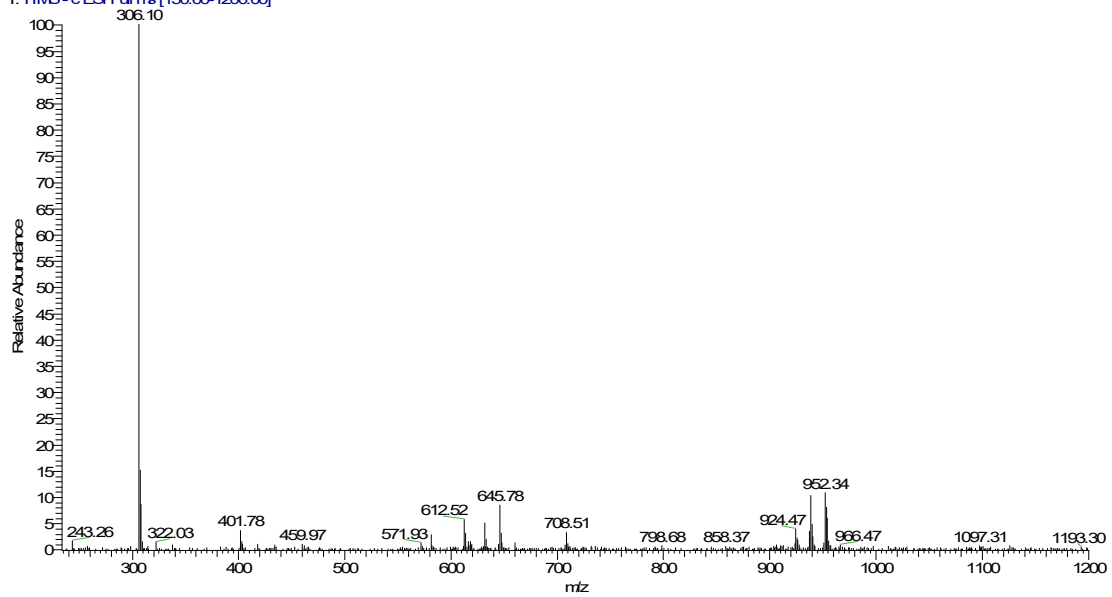

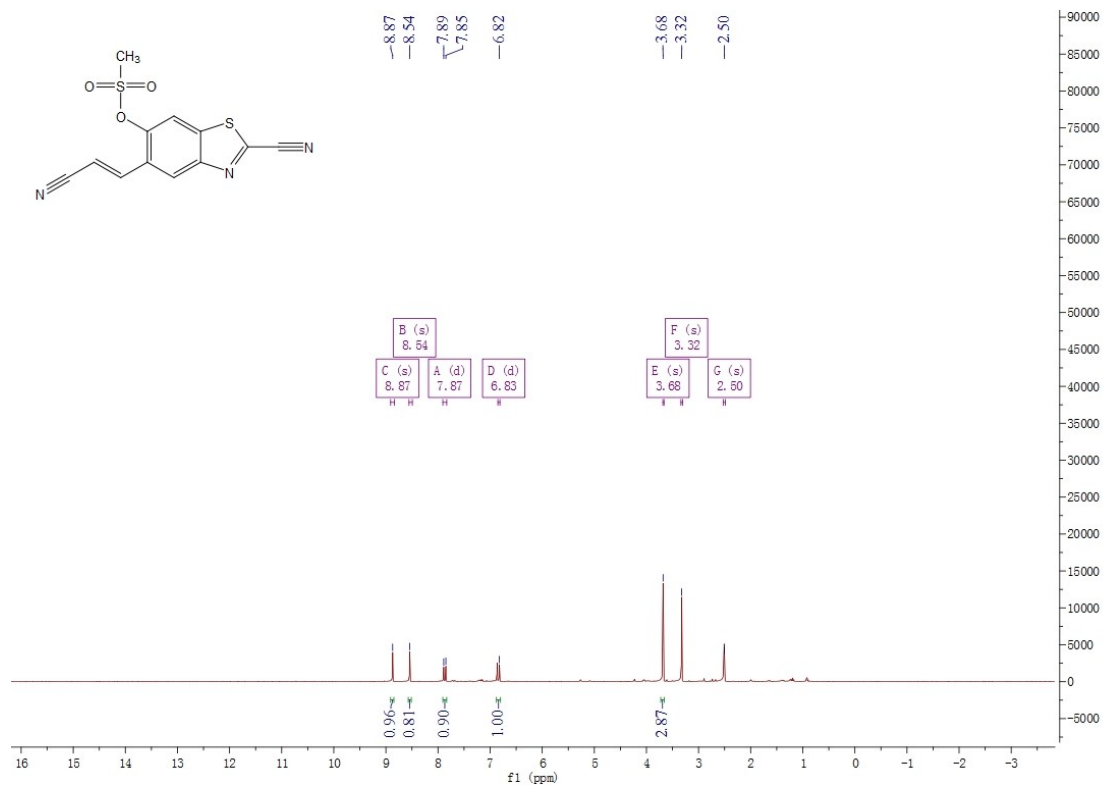

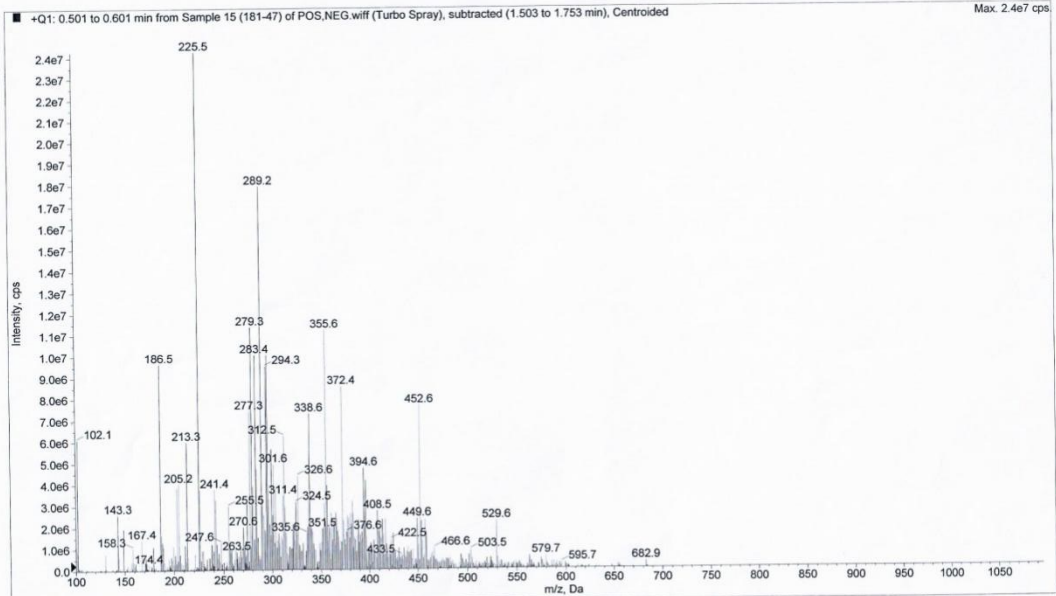

Acq. File: POS.NEG.wiff  
 Acq. Date: Friday, April 02, 2021  
 Acq. Time: 15:13  
 Batch Name: New acquisition batch  
 Sample Number: N/A  
 Sample Name: 181-47

Scan Mass(es): Start: 100.0, Stop:  
 Collision Energy: N/A  
 Ion Energy: N/A

Signature:  
 Drug Analysis Center  
 School of Pharmaceutical Science  
 Shandong University



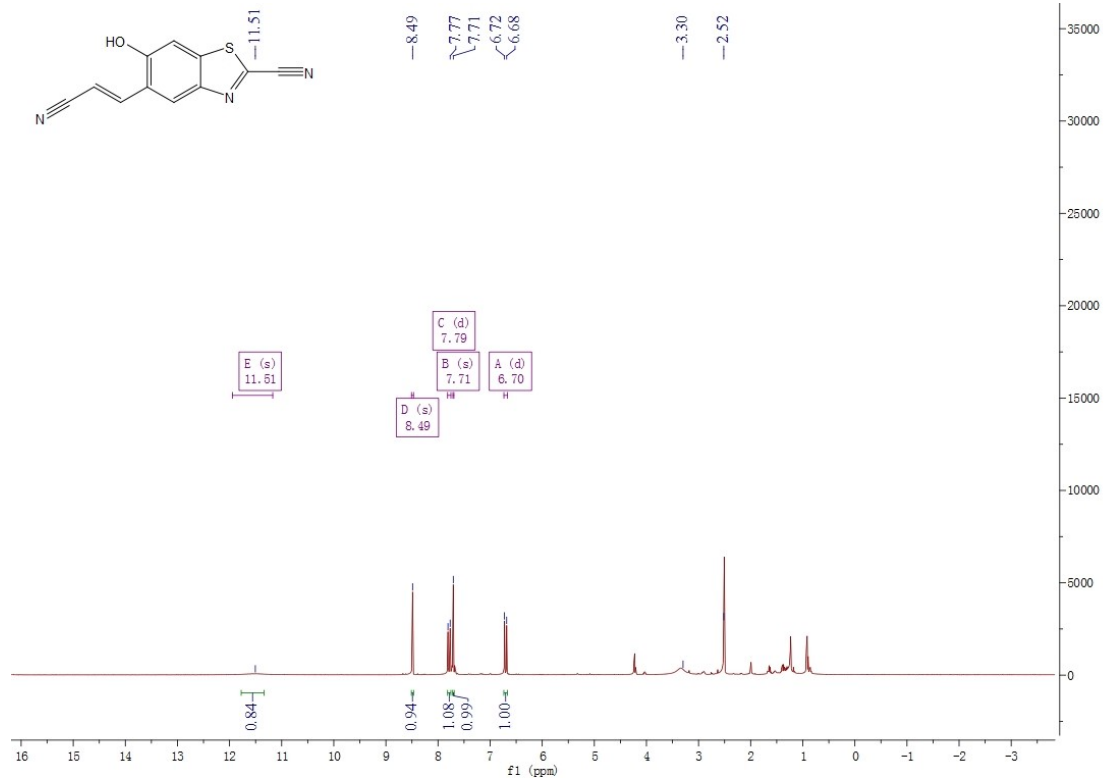

2020080320\_SDUL-181-54 #933 RT: 2.81 AV: 1 NL: 5.73E4  
 T: ITMS - c ESI Full ms [150.00-1200.00]

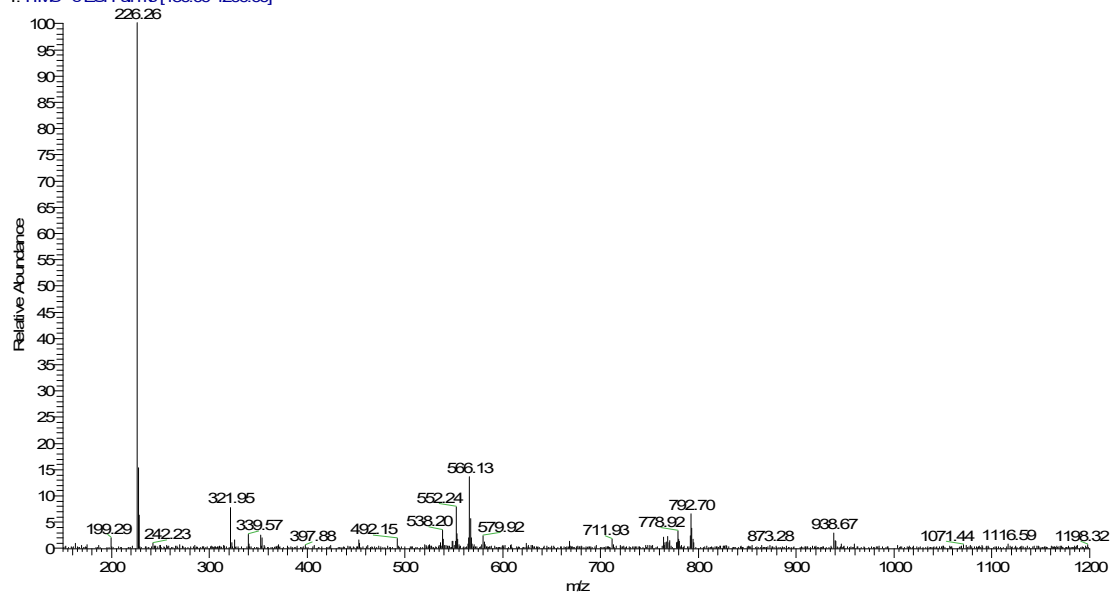

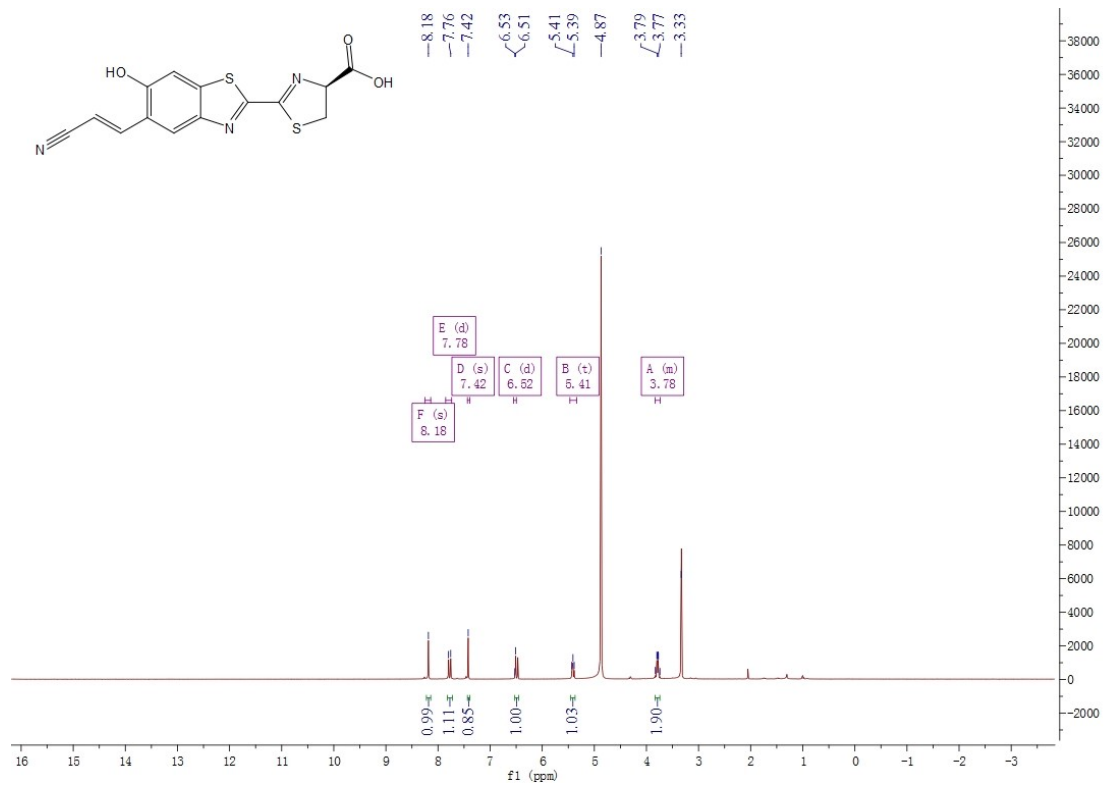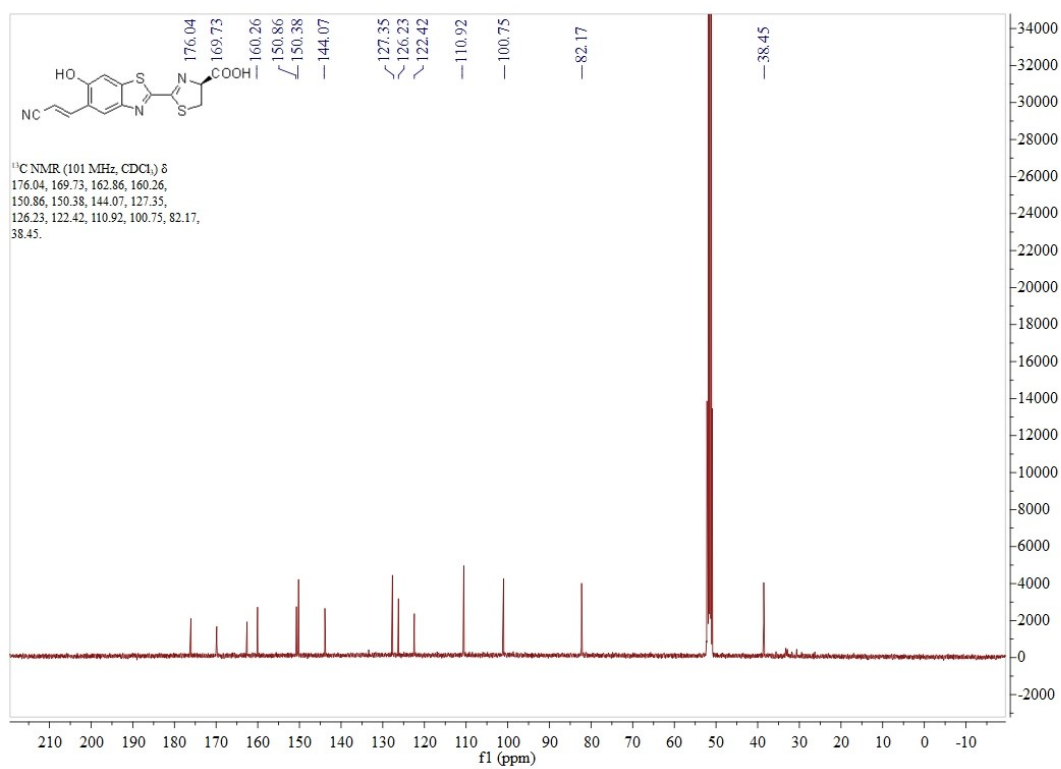

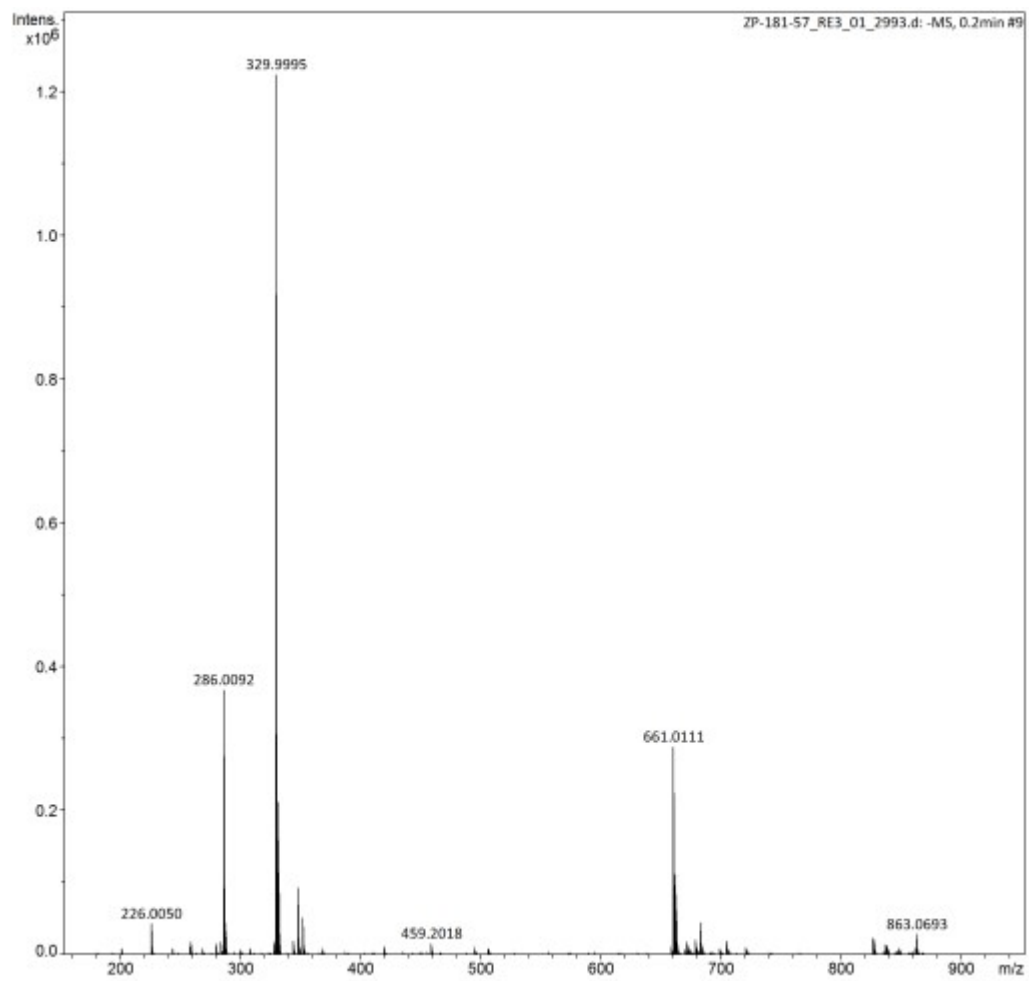

Supplement: d1ob02477a1.pdf [file d1ob02477a1.pdf]
